# Supplementary material for: Catalyst-free aziridine-based step-growth polymerization: a facile approach to optically active poly(sulfonamide amine)s and poly(sulfonamide dithiocarbamate)s
Source: Royal Society of Chemistry journal article supplement (doi:10.1039/d2py00771a), 2022-01-01
Supplement: d2py00771a1.pdf [file d2py00771a1.pdf]

## Supporting Information

# **Catalyst-Free Aziridine-Based Step-Growth Polymerization: A Facile Approach to Optically Active Poly(Sulfonamide Amine)s and Poly(Sulfonamide Dithiocarbamate)s**

*Shibin Chen,<sup>†</sup> Linlin Zhu,<sup>†</sup> and Zhen Zhang<sup>\*,†,‡</sup>*

<sup>†</sup>School of Chemical Engineering and Light Industry, Guangdong University of Technology,  
Guangzhou 510006, P. R. China

<sup>‡</sup>Key Laboratory of Polymer Processing Engineering (South China University of Technology),  
Ministry of Education, Guangzhou 510641, P. R. China

## Table of Contents

|                                                                                                    |    |
|----------------------------------------------------------------------------------------------------|----|
| 1 Experimental Section.....                                                                        | 3  |
| 1.1 Materials .....                                                                                | 3  |
| 1.2 Characterizations.....                                                                         | 3  |
| 1.3 General Procedure for the Synthesis of Chiral Bis( <i>N</i> -sulfonyl aziridine) .....         | 4  |
| 1.4 General Procedure for Polyaddition Between Bis(aziridine) and Diamine .....                    | 6  |
| 1.5 Procedure for the Synthesis of $\beta$ -Sulfonamido Dithiocarbamates.....                      | 8  |
| 1.6 General Procedure for Polyaddition Between Bis(aziridine) and Bis(dialkyldithiocarbamate)..... | 9  |
| 1.7 Antimicrobial Assay.....                                                                       | 12 |
| 2. Supporting Tables, Figures, and Schemes .....                                                   | 13 |
| 3. Spectroscopic NMR Data .....                                                                    | 24 |
| 4. Full SEC (DMF, 60 °C) Traces .....                                                              | 43 |
| 5. References.....                                                                                 | 57 |

# 1 Experimental Section

## 1.1 Materials

*N,N'*-Diethyl-1,6-diaminohexane (98%), *N,N'*-dimethyl-1,2-ethanediamine (98%), *N,N'*-dimethyl-1,3-propanediamine (98%), *N,N'*-bis(2-hydroxyethyl)ethylenediamine (98%), *p*-phenylenediamine (98%), (1*R*,2*R*)-(+)-1,2-diphenylethylenediamine (97%), 2-aminocyclohexanol (98%), 4,4'-bis(chlorosulfonyl)diphenyl ether (97%), *L*-phenylglycinol (98%), (S)-(+)-2-amino-1-propanol (98%), (S)-(+)-2-amino-3-methyl-1-butanol (97%), sulfuric acid (98%), sodium hydroxide (98%) were purchased commercially and used without further purification. Tetrahydrofuran (THF), toluene (Tol) were distilled from sodium benzophenone before use. Dichloromethane, acetonitrile, *N,N*-dimethylformamide (DMF), dimethyl sulfoxide (DMSO), triethylamine (Et<sub>3</sub>N), and carbon disulfide (98%) were dried over CaH<sub>2</sub> and distilled before use. 2-Methyl-1-tosylaziridine (TsMAz) was prepared according to the reported procedure.<sup>1</sup>

## 1.2 Characterizations

Nuclear magnetic resonance (<sup>1</sup>H NMR and <sup>13</sup>C NMR) spectra were recorded with a Bruker AVANCE III 400 spectrometer. Size exclusion chromatography (SEC) measurements were carried out in DMF with 0.01 M LiBr at 60 °C with the Agilent 1260 Infinity II instrument, equipped with two PLgel 10 μm MIXED-B columns and a differential refractive index (DRI) detector. The system was calibrated with poly( $\gamma$ -benzyl-*L*-glutamate) standards at a flow rate of 1.0 mL/min. FT-IR spectra were obtained on a Thermo-Fisher Nicolet 6700 spectrometer. Thermal stabilities were evaluated by performing the thermogravimetric analysis (TGA) on an STA 449 F5 Jupiter instrument under dry nitrogen at a heating rate of 10 °C/min. Differential scanning calorimetry (DSC) measurements were performed using a Mettler Toledo DSC3 calorimeter. Two scanning cycles of heating-cooling were performed in the temperature range from 25 to 250 °C with heating rates of 10 °C/min under nitrogen. *T*<sub>g</sub> was determined from the second heating run. Scanning electron microscopy (SEM) was performed on a TESCAN CLARA scanning electron microscope with an Xplore30 energy dispersive spectroscopy (EDS). The electrospinning apparatus (ET-3556H) was purchased from Beijing Ucalery Technology Company, China.

### 1.3 General Procedure for the Synthesis of Chiral Bis(*N*-sulfonyl aziridine)<sup>2,3</sup>

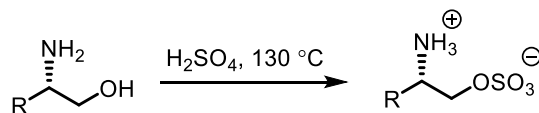

A cold mixture of sulfuric acid (98%, 10 g) and water (10 mL) was added to the chiral amino alcohol (100 mmol) in water (10 mL) at 0-5 °C. The mixture was heated to 110 °C for 3-4 h, and then water was carefully distilled off in vacuo to afford solid amino alcohol hydrogen sulfate.

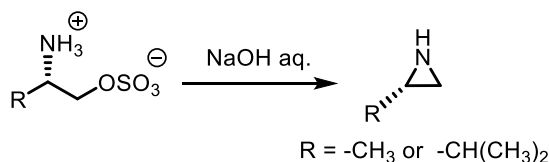

For the synthesis of (*S*)-2-methylaziridine and (*S*)-2-isopropylaziridine: To the crude amino alcohol hydrogen sulfate was added NaOH aq. (50 mL, 25wt%), and the mixture was stirred at room temperature for 2 h, then distilled at 140 °C under atmospheric pressure. The distillate was saturated with NaOH pellets, and the upper organic layer was separated and used for the next step.

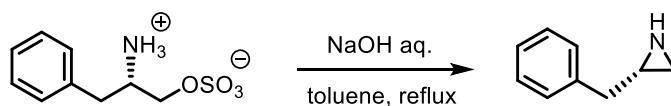

For the synthesis of (*S*)-2-benzylaziridine: Toluene (50 mL), and NaOH aq. (50 mL, 25wt%) were added to the crude amino alcohol hydrogen sulfate in sequence. The mixture was heated to reflux overnight. The organic phase was separated and dried over Na<sub>2</sub>SO<sub>4</sub>. After removal of the solvent, the residue was purified on a silica gel column with petroleum ether/EtOAc/Et<sub>3</sub>N (5:1:1, v/v) as eluent to afford the product as a colorless oil.

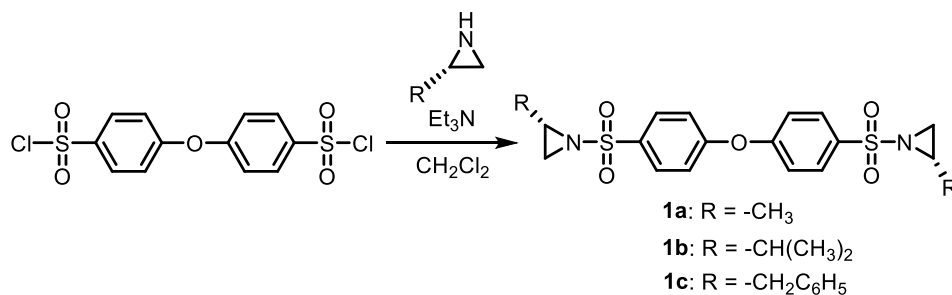

A solution of bis(chlorosulfonyl)diphenyl ether (10 mmol, 1.0 equiv) in anhydrous

dichloromethane (10 mL) was added dropwise to a solution of aziridine (25 mmol, 2.5 equiv) and triethylamine (30 mmol, 3.0 equiv) dissolved in anhydrous dichloromethane (10 mL) at 0 °C under N<sub>2</sub>. After the addition, the resulting mixture was allowed to warm to room temperature and stirred for 2~4 h. Then water (30 mL) was added to the mixture, and the mixture was extracted with dichloromethane (3 × 20 mL). The organic layers were combined and dried with Na<sub>2</sub>SO<sub>4</sub>. After removing the solvent under reduced pressure, the crude product was obtained, which was purified by column chromatography on silica gel eluting with petroleum ether/EtOAc (4/1, v/v) to give the product as a white solid.

*(2S,2'S)-1,1'-(oxybis(4,1-phenylenesulfonyl))bis(2-methylaziridine)* **1a**. White solid; 68% yield; IR (neat): 3107, 2975, 1572, 1483, 1322, 1261, 1143, 1025, 982, 826, 704, 666, 567 cm<sup>-1</sup>; <sup>1</sup>H NMR (400 MHz, CDCl<sub>3</sub>, TMS): δ 1.30 (6H, d, *J* = 4.0 Hz), 2.07 (2H, d, *J* = 8.0 Hz), 2.66 (2H, d, *J* = 8.0 Hz), 2.86-2.93 (2H, m), 7.17 (4H, d, *J* = 8.0 Hz), 7.97 (4H, d, *J* = 8.0 Hz). <sup>13</sup>C NMR (100 MHz, CDCl<sub>3</sub>): δ 17.0, 35.2, 36.3, 119.5, 130.5, 134.2, 160.1. HRMS (ESI+) calculated for C<sub>18</sub>H<sub>21</sub>N<sub>2</sub>O<sub>5</sub>S<sub>2</sub><sup>+</sup> (M<sup>+</sup>+H): 409.0892, found: 489.0887.

*(2S,2'S)-1,1'-(oxybis(4,1-phenylenesulfonyl))bis(2-isopropylaziridine)* **1b**. White solid; 81% yield; FT-IR (neat): 2975, 1591, 1492, 1332, 1247, 1143, 977, 954, 898, 841, 732, 586 cm<sup>-1</sup>; <sup>1</sup>H NMR (400 MHz, CDCl<sub>3</sub>, TMS): δ 0.83 (6H, d, *J* = 4.0 Hz), 0.93 (6H, d, *J* = 4.0 Hz), 1.41-1.50 (2H, m), 2.16 (2H, d, *J* = 8.0 Hz), 2.54-2.58 (2H, m), 2.66 (2H, d, *J* = 4.0 Hz), 7.18 (4H, d, *J* = 12.0 Hz), 7.99 (4H, d, *J* = 12.0 Hz). <sup>13</sup>C NMR (100 MHz, CDCl<sub>3</sub>): δ 19.1, 19.5, 30.1, 33.1, 46.4, 119.3, 130.6, 133.8, 160.0. HRMS (ESI+) calculated for C<sub>22</sub>H<sub>29</sub>N<sub>2</sub>O<sub>5</sub>S<sub>2</sub><sup>+</sup> (M<sup>+</sup>+H): 465.1518, found: 465.1507.

*(2S,2'S)-1,1'-(oxybis(4,1-phenylenesulfonyl))bis(2-benzylaziridine)* **1c**. White solid; 55% yield; FT-IR (neat): 3098, 1582, 1488, 1313, 1233, 1157, 931, 846, 718, 576, 510 cm<sup>-1</sup>; <sup>1</sup>H NMR (400 MHz, CDCl<sub>3</sub>, TMS): δ 2.22 (2H, d, *J* = 8.0 Hz), 2.70 (2H, dd, *J* = 8.0, 12.0 Hz), 2.77 (2H, d, *J* = 8.0 Hz), 2.89 (2H, dd, *J* = 8.0, 16.0 Hz), 3.00-3.06 (2H, m), 7.03 (4H, d, *J* = 8.0 Hz), 7.06-7.10 (4H, m), 7.18-7.22 (6H, m), 7.82 (4H, d, *J* = 8.0 Hz); <sup>13</sup>C NMR (100 MHz, CDCl<sub>3</sub>): 33.2, 37.6, 41.7, 119.2, 126.79, 128.6, 128.9, 130.5, 133.6, 137.1, 159.9. HRMS (ESI+) calculated for C<sub>30</sub>H<sub>29</sub>N<sub>2</sub>O<sub>5</sub>S<sub>2</sub><sup>+</sup> (M<sup>+</sup>+H): 561.1518, found: 561.1501.

## 1.4 General Procedure for Polyaddition Between Bis(aziridine) and Diamine

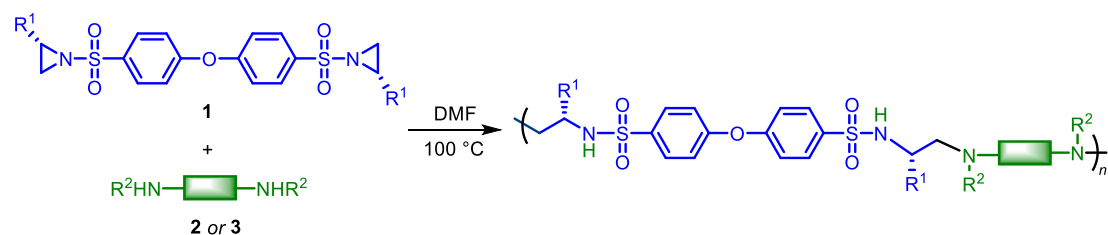

A flame-dried 10 mL Schlenk reaction tube, equipped with a stir bar, was charged with bis(*N*-sulfonyl aziridine) monomer (1.0 equiv), anhydrous DMF, and diamine (1.0 equiv) in sequence under N<sub>2</sub>. Then the tube was sealed and immersed in a preheated oil bath (100 °C). After stirring for a specific time, the reaction mixture was added slowly to methanol. The precipitate was collected via centrifugation and dried at 40 °C under vacuum to give the desired polymer.

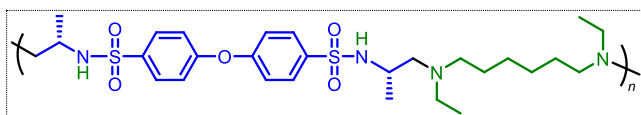

**P1:** FT-IR (neat): 3277, 2935, 1579, 1487, 1330, 1156, 1088, 870 cm<sup>-1</sup>; <sup>1</sup>H NMR (400 MHz, (CD<sub>3</sub>)<sub>2</sub>SO, TMS): δ 0.79 (6H, t, *J* = 8.0 Hz), 0.94 (6H, d, *J* = 8.0 Hz), 1.04-2.37 (8H, m), 2.02-2.42 (10H, m), 2.97-3.18 (2H, m), 7.20 (4H, d, *J* = 8.0 Hz), 7.10-7.50 (2H, m), 7.84 (4H, d, *J* = 8.0 Hz); <sup>13</sup>C NMR (100 MHz, (CD<sub>3</sub>)<sub>2</sub>SO): δ 11.4, 19.4, 26.5, 26.8, 47.2, 45.0, 53.3, 59.4, 119.1, 129.1, 137.2, 158.5.

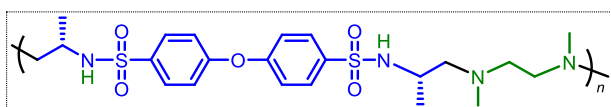

**P2:** FT-IR (neat): 3273, 2852, 1670, 1581, 1484, 1324, 1244, 1147, 994, 838 cm<sup>-1</sup>; <sup>1</sup>H NMR (400 MHz, CDCl<sub>3</sub>, TMS): δ 1.11 (6H, d, *J* = 4.0 Hz), 2.06 (6H, s), 2.25-2.28 (2H, m), 2.29-2.44 (4H, m), 2.46-2.60 (2H, m), 3.16-3.33 (2H, m), 5.66-6.53 (2H, m), 7.11 (4H, d, *J* = 8.0 Hz), 7.93 (4H, d, *J* = 8.0 Hz); <sup>13</sup>C NMR (100 MHz, CDCl<sub>3</sub>): δ 19.3, 42.4, 47.5, 54.9, 62.2, 119.3, 129.9, 136.3, 159.4.

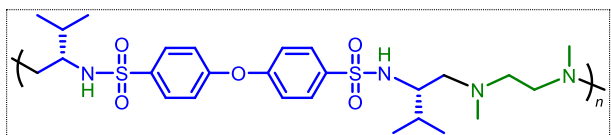

**P3:** FT-IR (neat): 3291, 2956, 1582, 1478, 1303, 1256, 1152, 1082, 1001, 945 cm<sup>-1</sup>; <sup>1</sup>H

NMR (400 MHz, (CD<sub>3</sub>)<sub>2</sub>SO, TMS):  $\delta$  0.72 (6H, d,  $J = 8.0$  Hz), 0.75 (6H, d,  $J = 8.0$  Hz), 1.68-1.93 (10H, m), 1.96-2.14 (4H, m), 2.14-2.29 (2H, m), 2.92-3.09 (2H, m), 7.16 (4H, d,  $J = 8.0$  Hz), 7.25-7.36 (2H, m), 7.83 (4H, d,  $J = 8.0$  Hz); <sup>13</sup>C NMR (100 MHz, CDCl<sub>3</sub>):  $\delta$  17.2, 18.0, 29.2, 42.1, 55.5, 56.4, 119.1, 129.8, 136.5, 159.3.

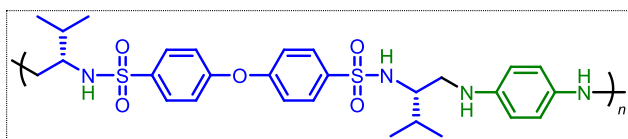

**P4:** FT-IR (neat): 3277, 2928, 1587, 1488, 1341, 1256, 1147, 1096, 879, 694, 562 cm<sup>-1</sup>; <sup>1</sup>H NMR (400 MHz, (CD<sub>3</sub>)<sub>2</sub>SO, TMS):  $\delta$  0.71 (6H, d,  $J = 8.0$  Hz), 0.75 (6H, d,  $J = 8.0$  Hz), 1.58-1.92 (2H, m), 2.58-2.97 (4H, m), 2.99-3.17 (2H, m), 4.22-4.83 (2H, br), 5.96-6.54 (4H, m), 7.14 (4H, d,  $J = 8.0$  Hz), 7.47-7.58 (2H, m), 7.83 (4H, d,  $J = 8.0$  Hz); <sup>13</sup>C NMR (100 MHz, (CD<sub>3</sub>)<sub>2</sub>SO):  $\delta$  16.7, 19.2, 45.8, 57.2, 119.0, 129.2, 137.4, 158.5.

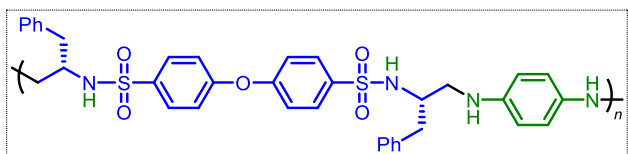

**P5:** FT-IR (neat): 3291, 2932, 1577, 1488, 1322, 1238, 1157, 1091, 864, 704, 567 cm<sup>-1</sup>; <sup>1</sup>H NMR (400 MHz, (CD<sub>3</sub>)<sub>2</sub>SO, TMS):  $\delta$  2.52-2.64 (2H, m), 2.75-3.06 (6H, m), 3.38-3.55 (2H, m), 4.75 (2H, br), 6.06-6.45 (4H, m), 6.83-7.26 (14H, m), 7.59 (4H, d,  $J = 8.0$  Hz), 7.75-7.89 (2H, m); <sup>13</sup>C NMR (100 MHz, (CD<sub>3</sub>)<sub>2</sub>SO):  $\delta$  38.3, 48.3, 54.6, 113.6, 115.5, 118.9, 126.0, 128.0, 128.7, 129.2, 136.7, 138.3, 139.6, 158.2.

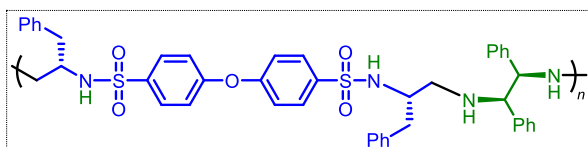

**P6:** FT-IR (neat): 3287, 3046, 2900, 1587, 1502, 1327, 1247, 1143, 1082, 958 cm<sup>-1</sup>; <sup>1</sup>H NMR (400 MHz, (CD<sub>3</sub>)<sub>2</sub>SO, TMS):  $\delta$  2.08-2.30 (4H, m), 2.39-2.47 (2H, m), 2.62-2.85 (2H, m), 2.90-3.03 (2H, m), 3.42-3.51 (2H, m), 6.83-6.97 (8H, m), 6.99-7.15 (18H, m), 7.54 (4H, d,  $J = 8.0$  Hz), 7.57-7.71 (2H, m); <sup>13</sup>C NMR (100 MHz, (CD<sub>3</sub>)<sub>2</sub>SO):  $\delta$  38.2, 50.1, 55.3, 68.3, 118.2, 125.9, 126.5, 127.6, 127.9, 128.0, 128.6, 129.3, 137.1, 138.4, 141.5, 158.0.

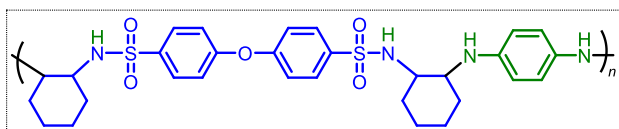

**P13:** FT-IR (neat): 3560, 3291, 2914, 1644, 1572, 1483, 1318, 1238, 1147, 1087  $\text{cm}^{-1}$ ;  
 $^1\text{H}$  NMR (400 MHz,  $(\text{CD}_3)_2\text{SO}$ , TMS):  $\delta$  1.0-1.30 (8H, m), 1.42-1.68 (6H, m), 1.84-2.07 (2H, m), 2.79-3.11 (4H, m), 3.98-4.36 (2H, m), 6.13-6.53 (4H, m), 7.21 (4H, d,  $J = 8.0$  Hz), 7.62-7.75 (2H, m), 7.87 (4H, d,  $J = 8.0$  Hz);  $^{13}\text{C}$  NMR (100 MHz,  $(\text{CD}_3)_2\text{SO}$ ):  $\delta$  22.5, 23.0, 30.2, 30.5, 54.7, 55.7, 114.4, 119.1, 129.1, 137.4, 139.3, 158.4.

### 1.5 Procedure for the Synthesis of $\beta$ -Sulfonamido Dithiocarbamates<sup>4</sup>

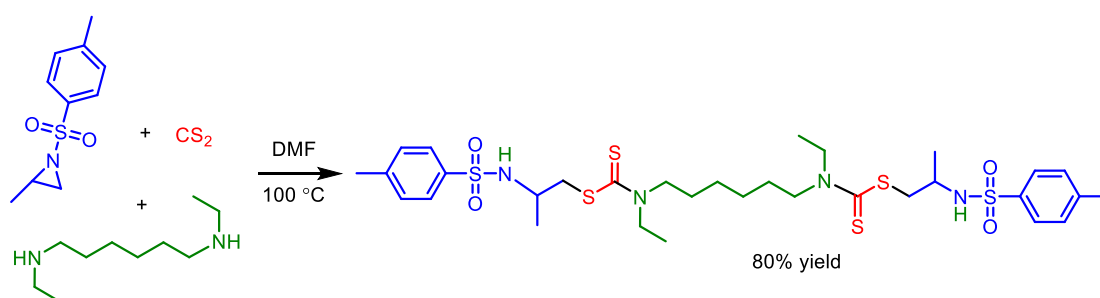

A flame-dried 10 mL Schlenk reaction tube, equipped with a stir bar, was charged with *N,N'*-diethyl-1,6-diaminohexane (0.5 mmol, 104  $\mu\text{L}$ , 1.0 equiv), and anhydrous DMF (2.5 mL) under  $\text{N}_2$ . The mixture was cooled to 0  $^\circ\text{C}$ , and carbon disulfide (2.0 mmol, 120  $\mu\text{L}$ , 4.0 equiv) was then added. After stirring for 2 h at 0  $^\circ\text{C}$ , TsMAz (1.0 mmol, 0.221 g, 2.0 equiv) was added to the mixture. The tube was then immersed in a preheated oil bath (100  $^\circ\text{C}$ ). After stirring for 6 h, the crude product was purified by column chromatography on silica gel eluting with petroleum ether/EtOAc (4/1, v/v) to give the product as a light yellow solid (0.298 g, 80% yield).

*Bis(2-((4-methylphenyl)sulfonamido)propyl) hexane-1,6-diylbis(ethylcarbamothioate)*.  $^1\text{H}$  NMR (400 MHz,  $\text{CDCl}_3$ , TMS):  $\delta$  1.0-1.31 (14H, m), 1.34-1.48 (5H, m), 1.51-1.87 (6H, m), 2.31-2.51 (6H, s), 3.23-3.43 (2H, m), 3.45-3.70 (8H, m), 3.78-4.13 (4H, m), 5.49-5.78 (2H, m), 7.25 (4H, d,  $J = 8.0$  Hz), 7.73 (4H, d,  $J = 8.0$  Hz);  $^{13}\text{C}$  NMR (100 MHz,  $\text{CDCl}_3$ ):  $\delta$  11.6, 12.5, 21.7, 22.3, 22.5, 25.7, 26.1, 25.7, 26.1, 26.35, 26.44, 26.5, 26.6, 27.0, 42.2, 42.3, 42.5, 47.7, 50.1, 50.75, 50.83, 50.87, 50.9, 51.0, 52.4, 55.3, 55.4, 68.1, 127.2, 129.6, 138.2, 143.0, 195.6, 195.8. HRMS (ESI+) calculated for  $\text{C}_{32}\text{H}_{51}\text{N}_4\text{O}_4\text{S}_6^+$  ( $\text{M}^+\text{+H}$ ): 747.2235, found: 747.2239.



## 1.6 General Procedure for Polyaddition Between Bis(aziridine) and Bis(dialkyldithiocarbamate)

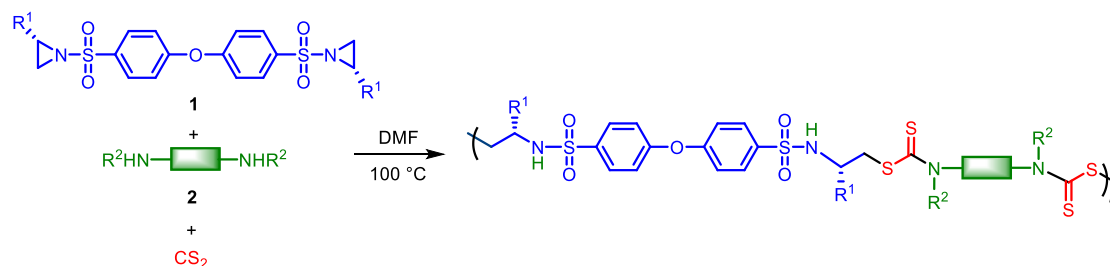

A flame-dried 10 mL Schlenk reaction tube, equipped with a stir bar, was charged with diamine (1.0 equiv) and anhydrous DMF. The mixture was cooled to 0 °C, and carbon disulfide (3.0 equiv) was then added. After stirring for 2 h at 0 °C, a solution of bis(aziridine) in DMF was added to the mixture. The tube was immersed in a preheated oil bath (100 °C). After stirring for a specific time, the reaction mixture was added slowly to methanol. The precipitate was collected via centrifugation and dried at 40 °C under vacuum to give the desired polymer.

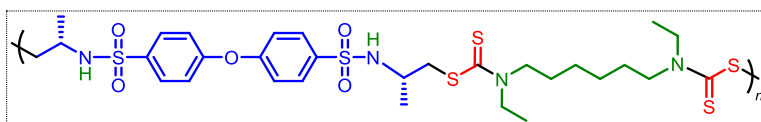

**P7:** FT-IR (neat): 3268, 2923, 1582, 1478, 1416, 1318, 1238, 1147, 1096  $\text{cm}^{-1}$ ;  $^1\text{H}$  NMR (400 MHz,  $(\text{CD}_3)_2\text{SO}$ , TMS):  $\delta$  1.06 (6H, d,  $J = 4.0$  Hz), 1.09-1.19 (6H, m), 1.21-1.36 (4H, m), 1.49-1.72 (4H, m), 3.09-3.30 (4H, m), 3.42-3.52 (2H, m), 3.52-3.73 (4H, m), 3.74-4.05 (4H, m), 7.22 (2H, d,  $J = 8.0$  Hz), 7.82 (2H, d,  $J = 8.0$  Hz), 7.79-7.89 (2H, m);  $^{13}\text{C}$  NMR (100 MHz,  $(\text{CD}_3)_2\text{SO}$ ):  $\delta$  11.2, 12.3, 20.92, 21.0, 21.01, 25.7, 25.8, 25.9, 26.7, 42.5, 42.6, 42.7, 47.0, 48.7, 49.6, 51.6, 54.1, 119.1, 129.13, 137.1, 158.5, 193.7, 193.8.

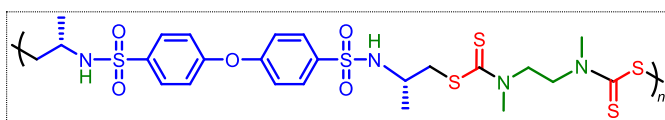

**P8:** FT-IR (neat): 3272, 2956, 1582, 1492, 1421, 1403, 1308, 1233, 1138, 982  $\text{cm}^{-1}$ ;  $^1\text{H}$  NMR (400 MHz,  $(\text{CD}_3)_2\text{SO}$ , TMS):  $\delta$  0.99-1.14 (6H, m), 3.13-3.29 (8H, m), 3.36-3.40 (2H, m), 3.42-3.55 (2H, m), 3.84-4.44 (4H, m), 7.21 (4H, d,  $J = 8.0$  Hz), 7.82 (4H, d,  $J = 8.0$  Hz), 7.85-7.90 (2H, m);  $^{13}\text{C}$  NMR (100 MHz,  $(\text{CD}_3)_2\text{SO}$ ):  $\delta$  20.8, 20.9, 42.7, 42.9, 43.0, 43.8, 48.9, 50.1, 50.2, 50.3, 52.4, 53.1, 119.0, 129.2, 137.1, 158.5, 196.40, 196.44.

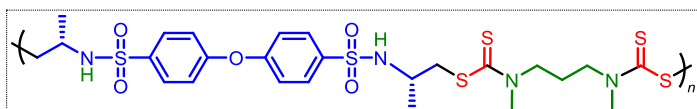

**P9:** FT-IR (neat): 3263, 2951, 1577, 1483, 1384, 1318, 1242, 1152, 1091, 977, 831, 685, 567  $\text{cm}^{-1}$ ;  $^1\text{H}$  NMR (400 MHz,  $(\text{CD}_3)_2\text{SO}$ , TMS):  $\delta$  0.89-1.11 (6H, m), 1.83-2.02 (2H, m), 3.01-3.31 (8H, m), 3.32-3.41 (2H, m), 3.61-3.81 (2H, m), 3.85-4.18 (2H, m), 7.21 (4H, d,  $J = 8.0$  Hz), 7.82 (4H, d,  $J = 8.0$  Hz), 7.70-7.89 (2H, m);  $^{13}\text{C}$  NMR (100 MHz,  $(\text{CD}_3)_2\text{SO}$ ):  $\delta$  20.9, 21.1, 23.5, 24.1, 30.5, 42.6, 42.8, 43.0, 43.3, 43.4, 48.6, 48.7, 51.1, 51.4, 53.5, 53.8, 119.2, 129.2, 137.1, 158.6, 194.4, 194.6, 195.4, 195.7.

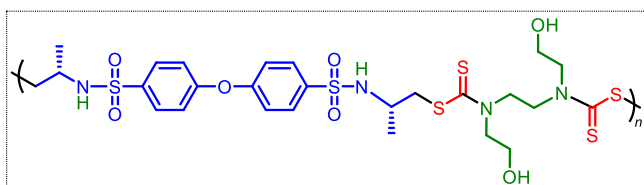

**P10:** FT-IR (neat): 3514, 3253, 2908, 1572, 1490, 1401, 1311, 1235, 1154, 979  $\text{cm}^{-1}$ ;  $^1\text{H}$  NMR (400 MHz,  $(\text{CD}_3)_2\text{SO}$ , TMS):  $\delta$  0.91-1.09 (6H, m), 3.09-3.36 (4H, m), 3.46-3.54 (2H, m), 3.61-3.88 (6H, m), 3.91-4.39 (4H, m), 4.81-5.16 (2H, m), 7.22 (4H, d,  $J = 8.0$  Hz), 7.82 (4H, d,  $J = 8.0$  Hz), 7.79-7.89 (2H, m);  $^{13}\text{C}$  NMR (100 MHz,  $(\text{CD}_3)_2\text{SO}$ ):  $\delta$  20.7, 20.8, 36.9, 42.8, 43.1, 43.2, 48.7, 49.5, 50.3, 51.2, 52.1, 55.1, 55.3, 57.2, 57.6, 57.9, 58.0, 58.2, 119.3, 129.2, 137.2, 158.6, 195.9, 196.4, 196.7.

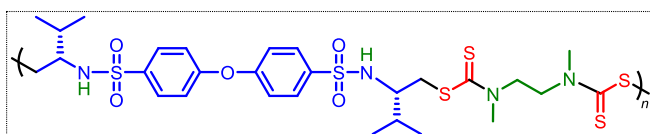

**P11:** FT-IR (neat): 3272, 2965, 1663, 1577, 1483, 1398, 1313, 1251, 1157, 1150, 987  $\text{cm}^{-1}$ ;  $^1\text{H}$  NMR (400 MHz,  $(\text{CD}_3)_2\text{SO}$ , TMS):  $\delta$  0.63-0.97 (12H, m), 1.68-1.90 (2H, m), 2.82-3.20 (6H, m), 3.25-3.42 (4H, m), 3.72-4.57 (4H, m), 7.17 (4H, d,  $J = 8.0$  Hz), 7.80 (4H, d,  $J = 8.0$  Hz), 7.64-7.95 (2H, m);  $^{13}\text{C}$  NMR (100 MHz,  $(\text{CD}_3)_2\text{SO}$ ):  $\delta$  17.3, 17.4, 17.7, 17.8, 18.5, 18.7, 18.9, 30.5, 31.1, 31.2, 31.5, 31.8, 40.3, 43.7, 43.9, 50.2, 52.3, 53.0, 57.2, 57.4, 119.0, 129.2, 137.6, 158.5, 195.5, 195.7, 196.5, 196.9.

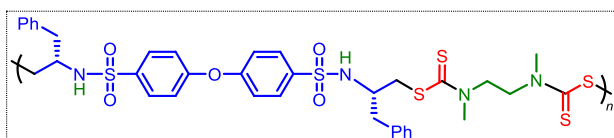

**P12:** FT-IR (neat): 3282, 2982, 1663, 1582, 1488, 1370, 1322, 1242, 1143, 1077, 987  $\text{cm}^{-1}$ ;  $^1\text{H}$  NMR (400 MHz,  $(\text{CD}_3)_2\text{SO}$ , TMS):  $\delta$  2.53-2.88 (4H, m), 2.91-3.22 (6H, m),

3.22-3.38 (4H, m), 3.57-3.73 (2H, m), 3.78-4.38 (4H, m), 6.88-7.29 (14H, m), 7.67 (4H, d,  $J = 8.0$  Hz), 7.86-8.00 (2H, m).  $^{13}\text{C}$  NMR (100 MHz,  $(\text{CD}_3)_2\text{SO}$ ):  $\delta$  30.5, 40.4, 40.7, 40.8, 41.1, 41.3, 41.4, 43.7, 44.0, 43.8, 43.9, 50.3, 51.0, 52.4, 53.1, 53.9, 119.0, 126.4, 129.0, 129.5, 136.9, 137.0, 137.3, 158.3, 195.2, 195.3, 196.3, 196.7.

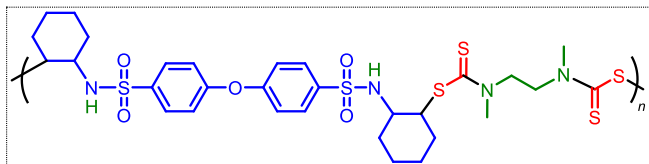

**P14:** FT-IR (neat): 3272, 2923, 1658, 1582, 1492, 1379, 1322, 1251, 1157, 1068, 958  $\text{cm}^{-1}$ .  $^1\text{H}$  NMR (400 MHz,  $\text{CDCl}_3$ , TMS):  $\delta$  1.01-1.83 (14H, m), 1.89-2.29 (4H, m), 2.97-3.30 (6H, m), 3.34-3.53 (1H, m), 3.72-4.48 (5H, m), 6.08-6.57 (2H, m), 6.88-7.17 (4H, m), 7.64-8.04 (4H, m);  $^{13}\text{C}$  NMR (100 MHz,  $\text{CDCl}_3$ ):  $\delta$  24.6, 26.6, 29.8, 32.6, 32.8, 35.9, 36.1, 36.3, 36.4, 41.1, 41.2, 44.9, 52.8, 53.0, 54.5, 54.8, 59.1, 59.2, 59.4, 59.7, 59.8, 77.4, 118.9, 119.1, 129.4, 128.6, 137.4, 137.8, 159.1, 159.3, 198.8, 199.0.

## 1.7 Antimicrobial Assay

**1) Medium preparation.** 2.5 g of LB broth medium and 100 mL of distilled water was mixed in a 250 mL bottle. The mixture was then sterilized in a high-pressure steam sterilizer at 121°C for 15 min.

**2) Bacterial suspension preparation.** 3 mL of LB liquid medium was added to the bacterial culture tube, followed by the addition of *S. aureus* or *E. coli* colony. The culture solution was shaken for 15 h (37 °C, 200 rpm).

**3) Colony counting assay.** The polymer films were sterilized in a high-pressure steam sterilizer at 121°C for 20 min before use.

The antibacterial activity of the polymer film was quantitatively evaluated using the viable cell count method. *S. aureus* or *E. coli* bacterial solution was diluted with LB liquid medium to 10<sup>6</sup> CFU/mL. In the petri dish, 8 µL of the diluted bacterial solution was added to the surface of the polymer film, and no polymer sample was used for the blank control. After being cultivated at 37 °C for 4 h, the samples were immersed in 1.5 mL of PBS buffer and ultrasonicated for 3 min to release the adherent bacteria into PBS solution. Then the bacteria suspension was diluted 10 and 100 times, and 100 µL of each dilution was dispersed onto an agar plate. Survival colonies on agar plate were counted after incubation at 37 °C for 18 h. Each assay was performed in 3 replicates. The bacterial reduction(%) was calculated according to the following equation:

$$R = (1-A/B) \times 100\%$$

where R is the bacterial reduction (%), A and B are the number of live bacterial cells in the flask of treated and control samples, respectively.

## 2. Supporting Tables, Figures, and Schemes

**Table S1. Screening of the Polyaddition between Racemic Bis(aziridine) 1a and Diamine 2a**

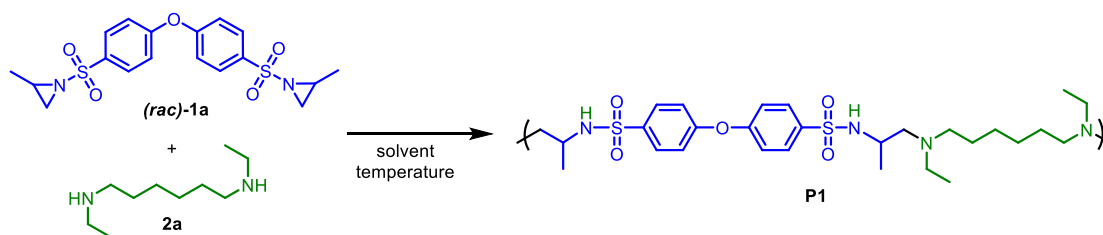

| entry <sup>a</sup> | solvent | temperature<br>(°C) | time<br>(h) | $M_{n,SEC}^b$<br>(kDa) | $D^b$ |
|--------------------|---------|---------------------|-------------|------------------------|-------|
| 1                  | DMSO    | 100                 | 16.5        | 30.3                   | 1.41  |
| 2                  | DMF     | 100                 | 16.5        | 36.5                   | 1.49  |
| 3                  | toluene | 100                 | < 3         | gel                    | -     |
| 4                  | THF     | 55                  | < 3         | gel                    | -     |

<sup>a</sup>Reaction conditions: **(rac)-1a** (0.2 mmol, 1.0 equiv, 0.2 M), **2a** (1.0 equiv).

<sup>b</sup>Determined by SEC in DMF at 60 °C (poly( $\gamma$ -benzyl-*L*-glutamate) standards calibration).

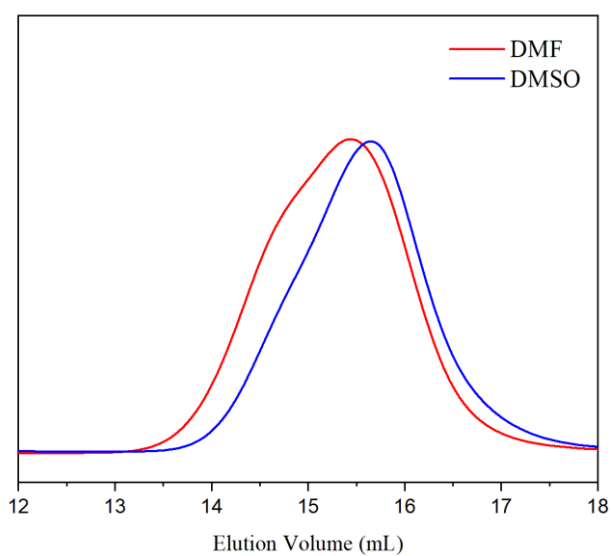

**Fig. S1** SEC (DMF, 60 °C, poly( $\gamma$ -benzyl-*L*-glutamate) standards) traces of polymers synthesized in DMF and DMSO (entries 1 & 2, Table S1).

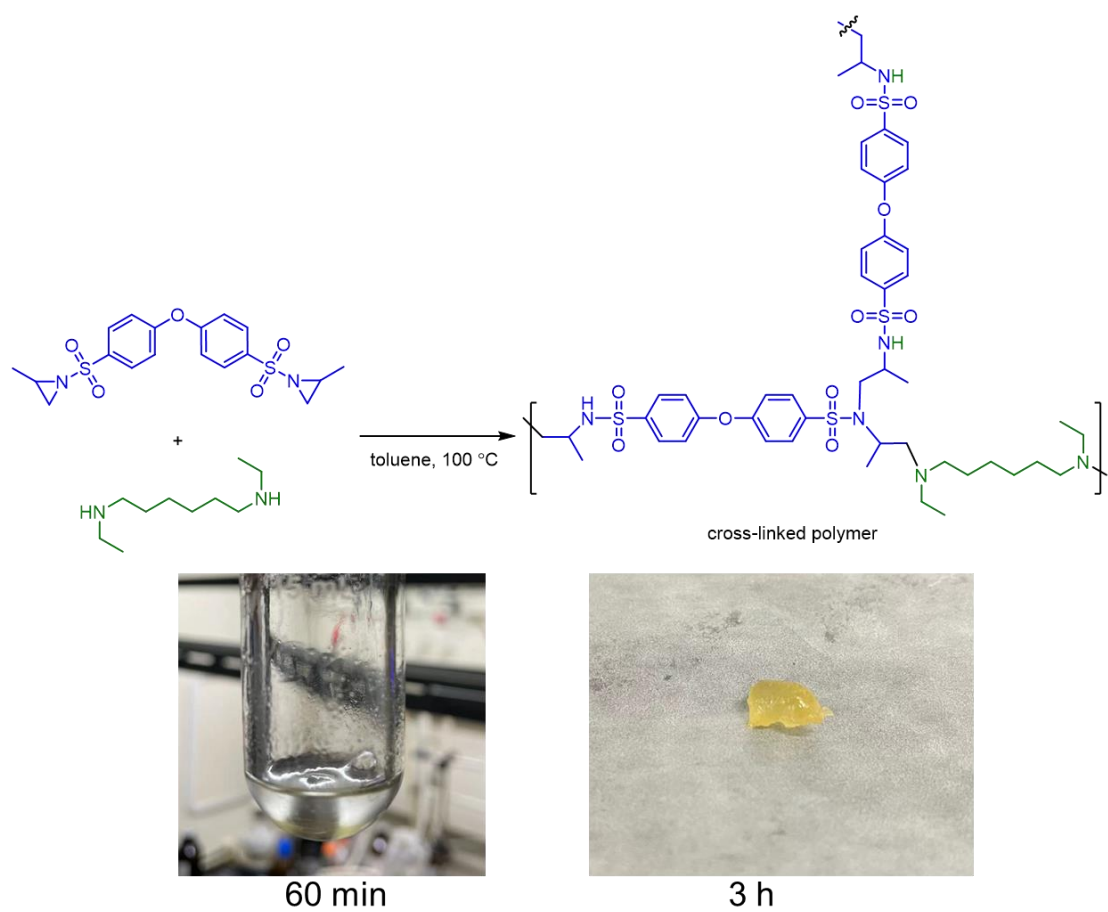

**Scheme S1.** Polymerization of (*rac*)-**1a** and **2a** in toluene at 100 °C (Photos of the reaction mixture in 60 min, and the gel formed in 3 h).

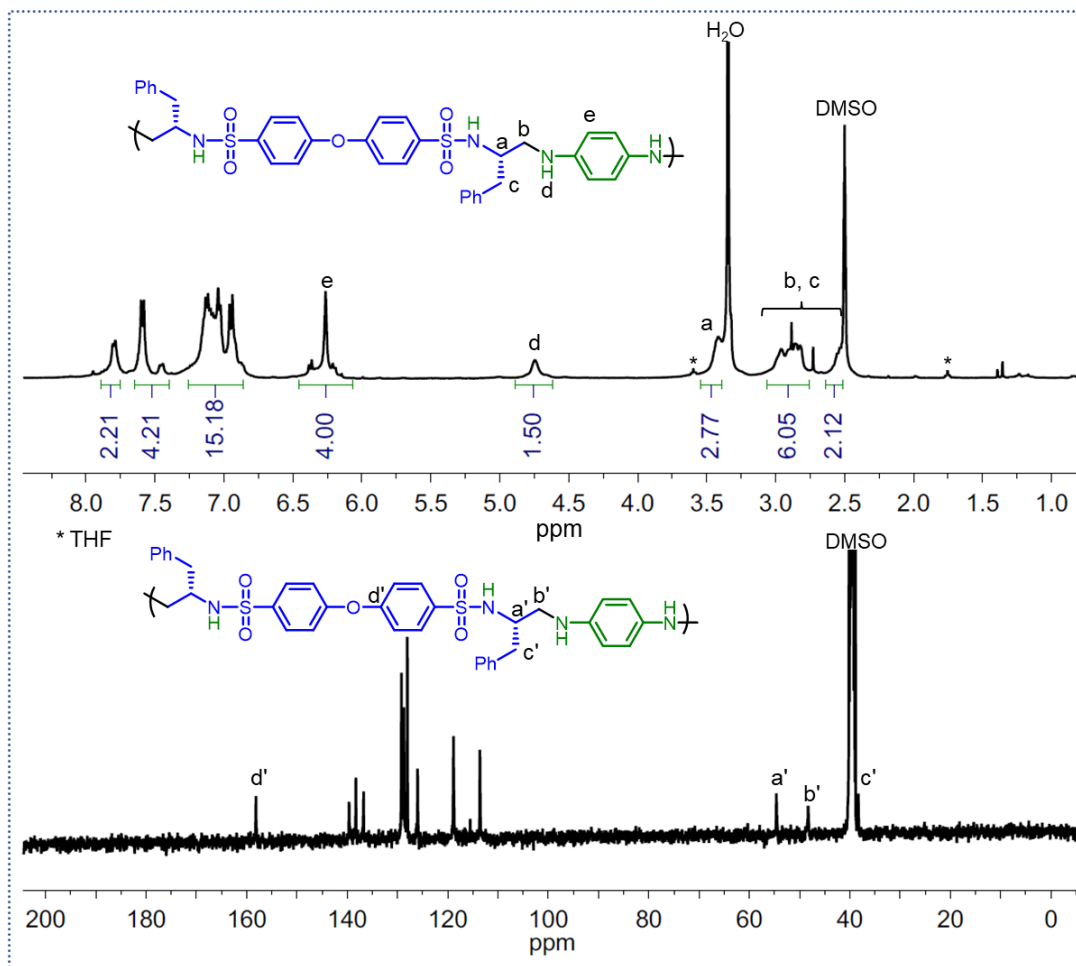

**Fig. S2**  $^1\text{H}$  (400 MHz,  $\text{DMSO-}d_6$ ,  $25\text{ }^\circ\text{C}$ ) and  $^{13}\text{C}$  (100 MHz,  $\text{DMSO-}d_6$ ,  $25\text{ }^\circ\text{C}$ ) NMR spectra of the synthesized **P5**.

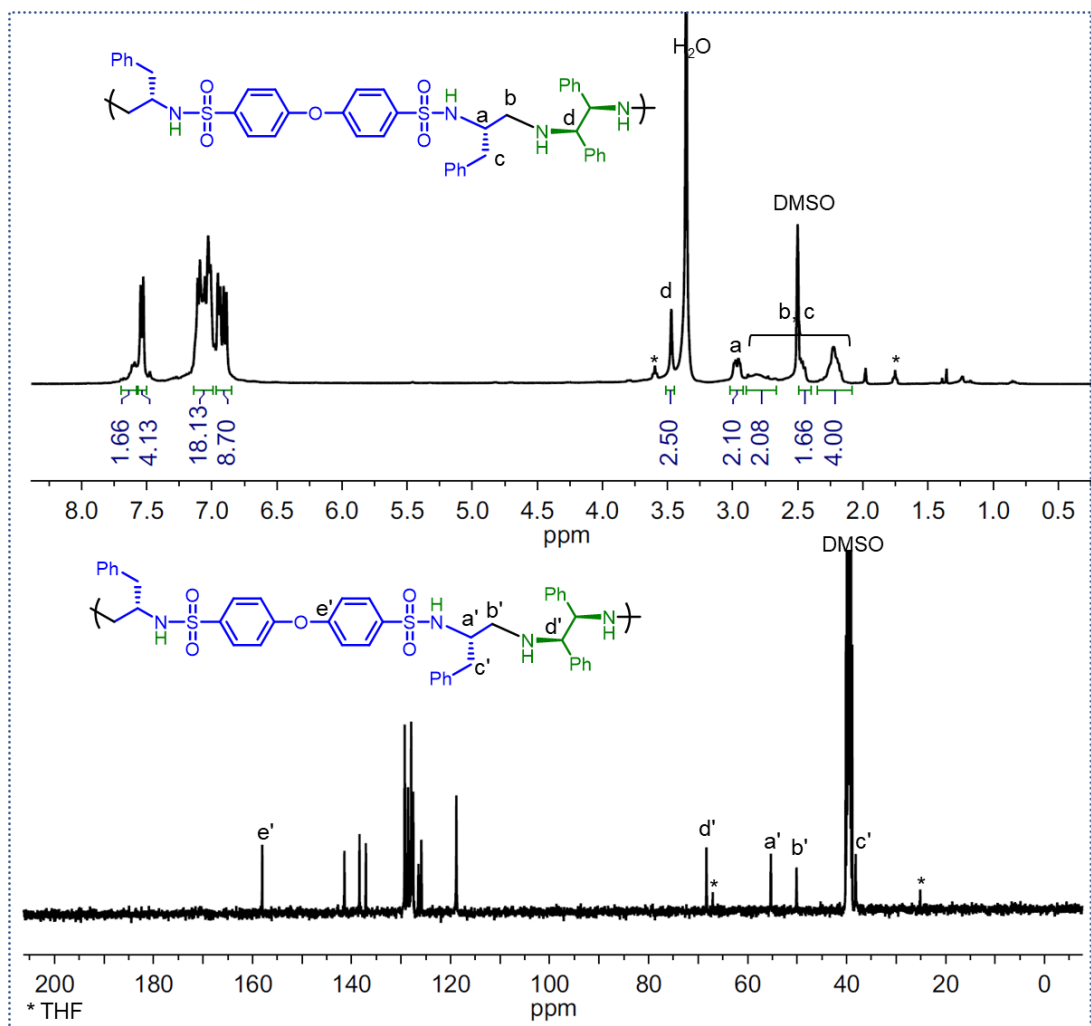

**Fig. S3**  $^1\text{H}$  (400 MHz,  $\text{DMSO-}d_6$ , 25 °C) and  $^{13}\text{C}$  (100 MHz,  $\text{DMSO-}d_6$ , 25 °C) NMR spectra of the synthesized **P6**.



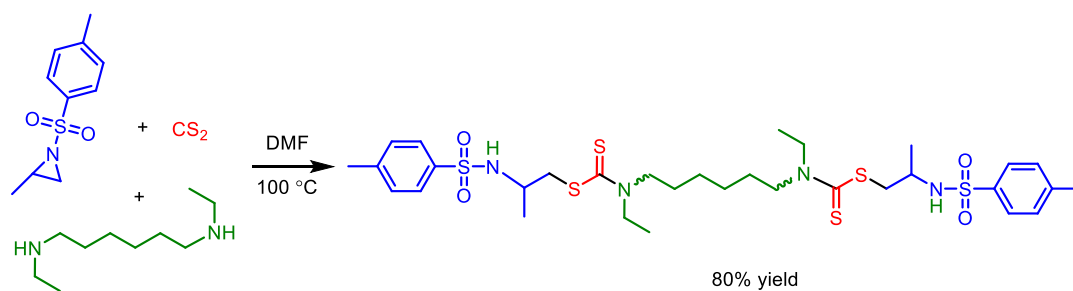

**Scheme S2.** The model reaction of TSMaz, CS<sub>2</sub>, and *N,N'*-diethyl-1,6-diaminohexane (2.1:4.0/1.0) for the synthesis of  $\beta$ -sulfonamido dithiocarbamates.

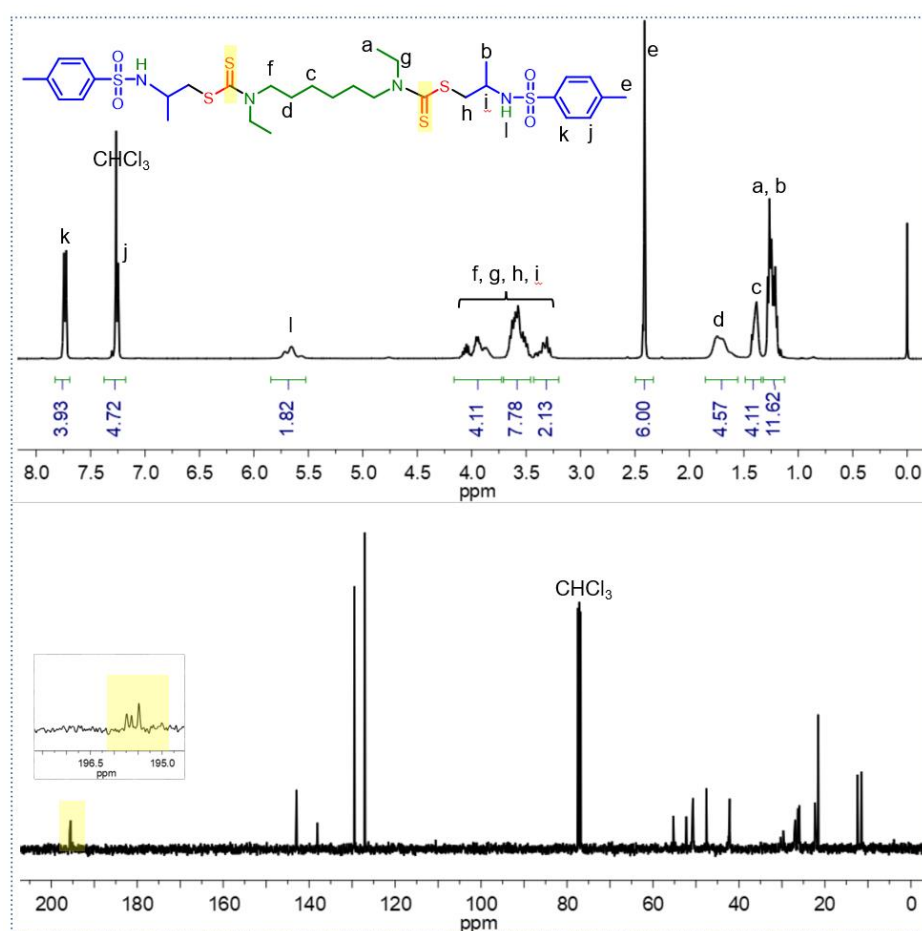

**Fig. S4** <sup>1</sup>H (400 MHz, CDCl<sub>3</sub>, 25 °C) and <sup>13</sup>C (100 MHz, CDCl<sub>3</sub>, 25 °C) spectra of the synthesized  $\beta$ -sulfonamido dithiocarbamates.

CSB-1-123 #487 RT: 4.83 AV: 1 NL: 1.56E9  
T: FTMS +p ESI Full ms [150.0000-1500.0000]

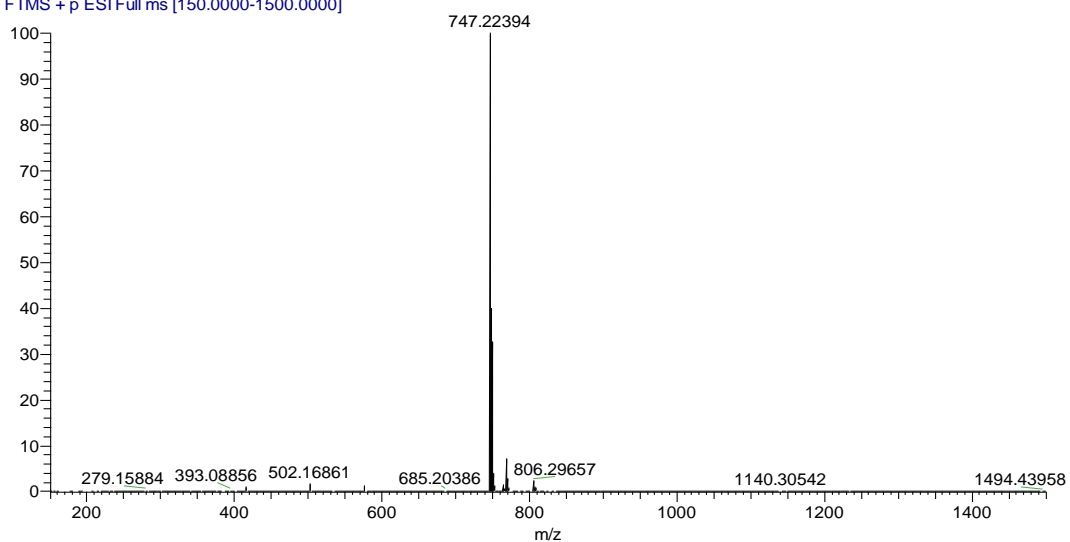

**Fig. S5** HR-MS spectrum of the synthesized  $\beta$ -sulfonamido dithiocarbamates (calculated for  $C_{32}H_{51}N_4O_4S_6^+$  ( $M^+ + H$ ): 747.2235, found: 747.2239).

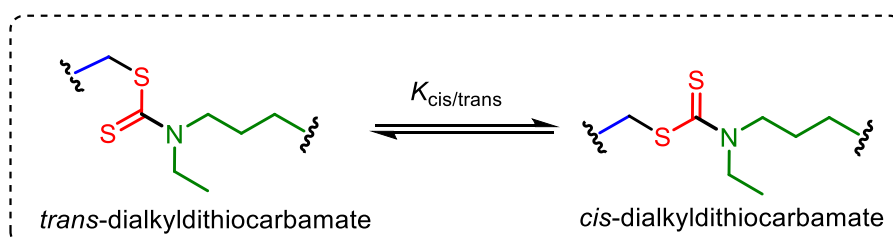

**Scheme S3.** The *E*- and *Z*-rotamers for dithiocarbamates.

**Table S2. Screening of Polyaddition Between Racemic Bisaziridine **1a**, Diamine **2a**, and CS<sub>2</sub>**

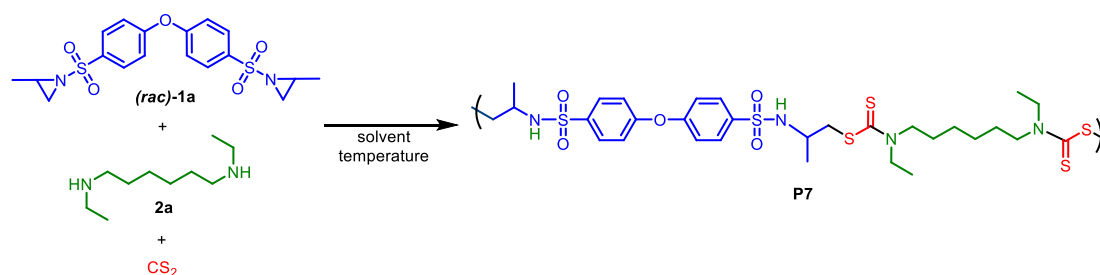

| entry <sup>a</sup> | solvent            | temperature | time (h) | $M_{n,SEC}^b$ (kDa) | $D^b$ |
|--------------------|--------------------|-------------|----------|---------------------|-------|
| 1                  | CH <sub>3</sub> CN | 80          | 3        | 33.8                | 1.68  |
| 2                  | DMF                | 80          | 3        | 25.5                | 1.68  |
| 3                  | DMSO               | 80          | 3        | 14.9                | 1.39  |
| 4                  | Tol                | 80          | 3        | 24.4                | 1.57  |
| 5                  | THF                | 55          | 3        | 20.1                | 1.97  |
| 6                  | DMF                | 60          | 3        | 20.0                | 1.61  |
| 7                  | DMF                | 100         | 3        | 28.5                | 2.02  |

<sup>a</sup>Reaction conditions: **1a** (0.2 mmol, 1.0 equiv, 0.2 M), **1b** (1.0 equiv). <sup>b</sup> Determined by SEC in DMF at 60 °C (poly( $\gamma$ -benzyl-*L*-glutamate) standards calibration).

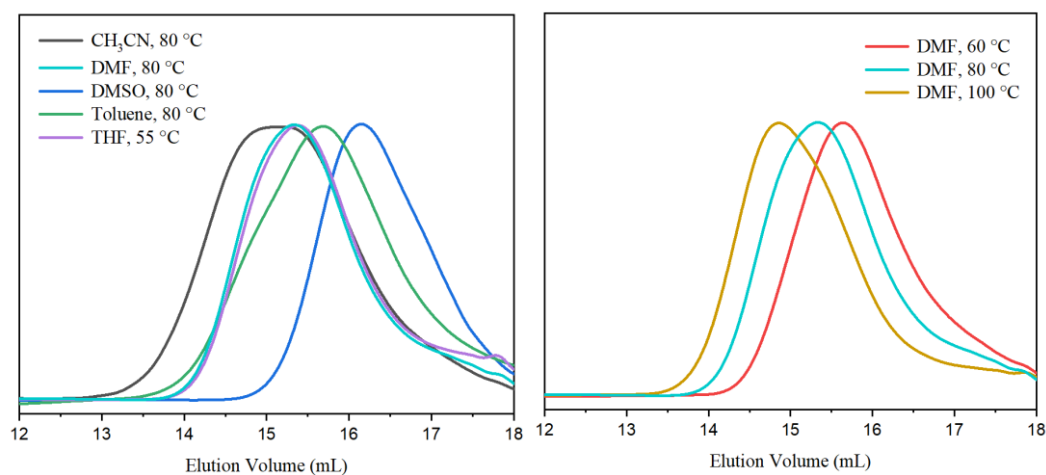

**Fig. S6** SEC (DMF, 60 °C, poly( $\gamma$ -benzyl-*L*-glutamate) standards) traces of polymers synthesized in Table S2.

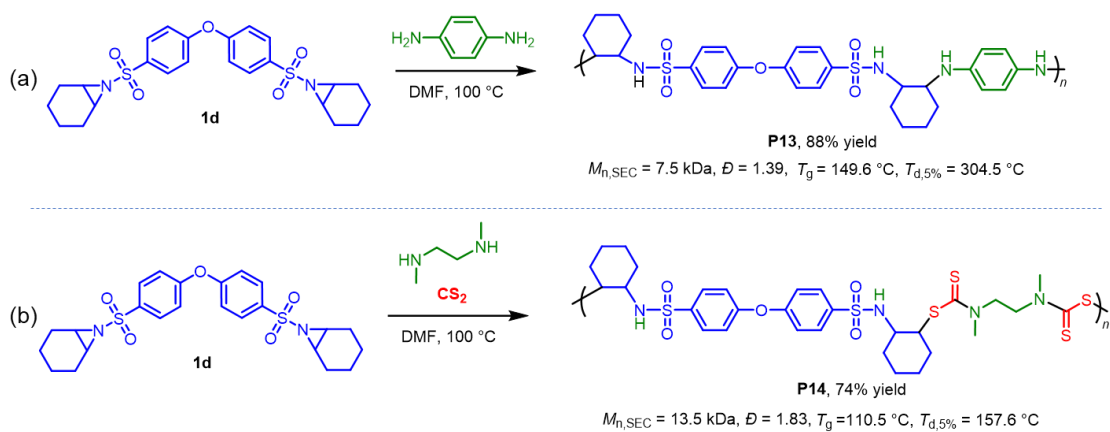

**Scheme S4.** Synthesis of **P13** and **P14** from bis(*N*-sulfonyl aziridine) **1d**.

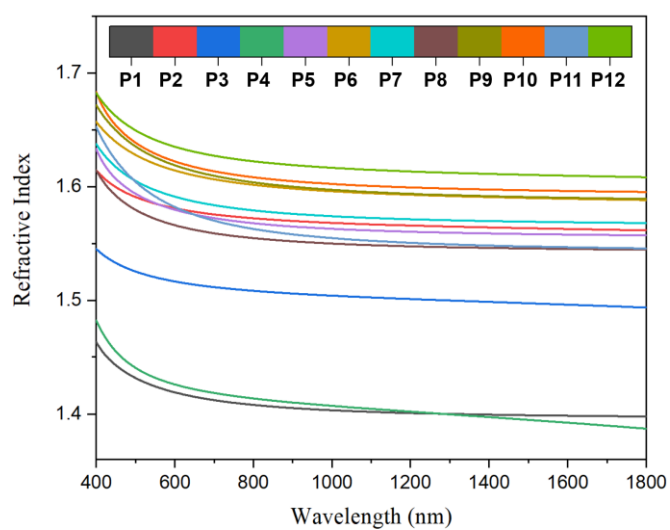

**Fig. S7** Refractive indexes of **P1-P12**.

**Table S3.** Refractive index ( $n_{633}$ ), Abbé number ( $v_D$ ), modified Abbé number ( $v'_D$ ), optical dispersions ( $D$  and  $D'$ ) and thickness of thin films of polymers **P1-P14**.<sup>a</sup>

| polymer    | $n_{633}$ | $v_D$  | $D$    | $v'_D$ | $D'$    | thickness (nm) |
|------------|-----------|--------|--------|--------|---------|----------------|
| <b>P1</b>  | 1.416     | 21.480 | 0.0466 | 106.3  | 0.00941 | 18.81          |
| <b>P2</b>  | 1.579     | 37.852 | 0.0264 | 132.2  | 0.00757 | 82.79          |
| <b>P3</b>  | 1.515     | 37.866 | 0.0264 | 78.0   | 0.0128  | 42.71          |
| <b>P4</b>  | 1.423     | 18.933 | 0.0528 | 33.3   | 0.0301  | 79.58          |
| <b>P5</b>  | 1.577     | 26.643 | 0.0376 | 143.4  | 0.00697 | 32.00          |
| <b>P6</b>  | 1.611     | 28.856 | 0.0347 | 114.1  | 0.00876 | 515.17         |
| <b>P7</b>  | 1.588     | 27.574 | 0.0363 | 139.4  | 0.00717 | 46.18          |
| <b>P8</b>  | 1.563     | 27.161 | 0.0368 | 146.5  | 0.00682 | 35.46          |
| <b>P9</b>  | 1.615     | 24.074 | 0.0415 | 108.5  | 0.00922 | 640.6          |
| <b>P10</b> | 1.619     | 24.494 | 0.0408 | 124.6  | 0.00803 | 61.32          |
| <b>P11</b> | 1.577     | 17.043 | 0.0587 | 88.0   | 0.0114  | 181.87         |
| <b>P12</b> | 1.632     | 28.551 | 0.0350 | 112.1  | 0.00892 | 268.64         |
| <b>P13</b> | 1.574     | 19.078 | 0.0524 | 52.6   | 0.0190  | 77.01          |
| <b>P14</b> | 1.467     | 11.199 | 0.0893 | 22.5   | 0.0444  | 86.04          |

<sup>a</sup>Abbreviation:  $n$  = refractive index,  $v_D$  = Abbé number =  $(n_{589} - 1)/(n_{486} - n_{656})$ ,  $v'_D$  =  $(n_{1319} - 1)/(n_{1060} - n_{1550})$ ,  $D' = 1/v'_D$ .

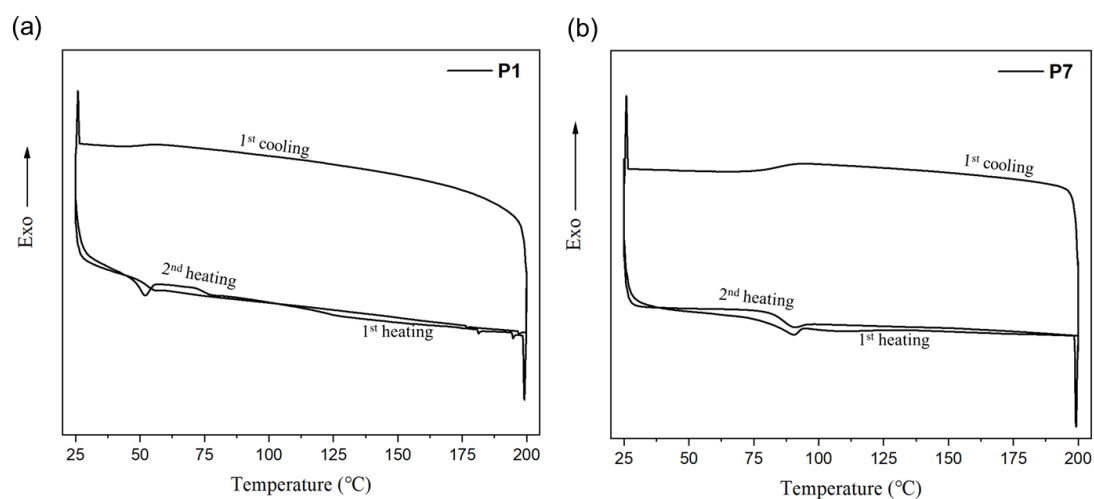

**Fig. S8** The complete DSC curves of **P1** and **P7**.

***S. aureus***

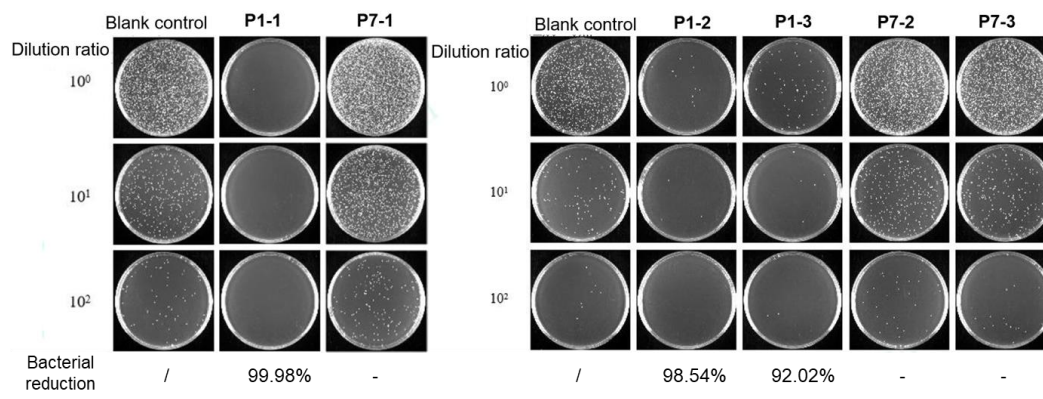

***E. coli***

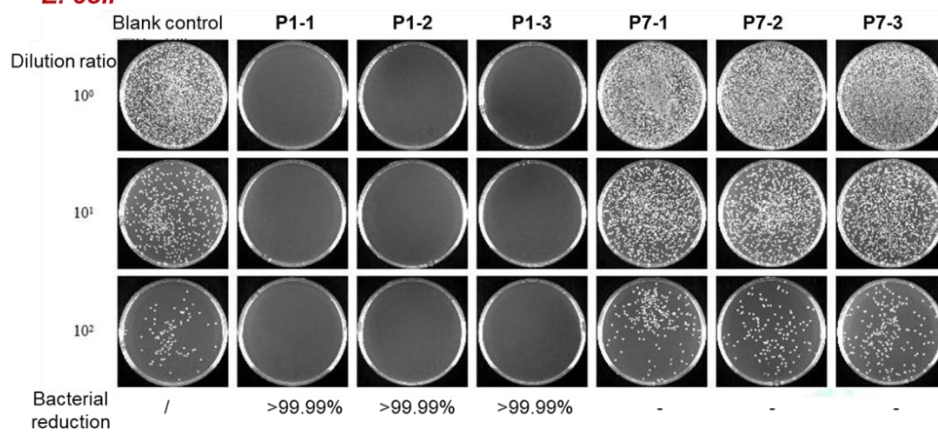

**Fig. S9** Photographs of the *S. aureus* and *E. coli* colonies (P1 and P7 films, each assay was performed in 3 replicates).

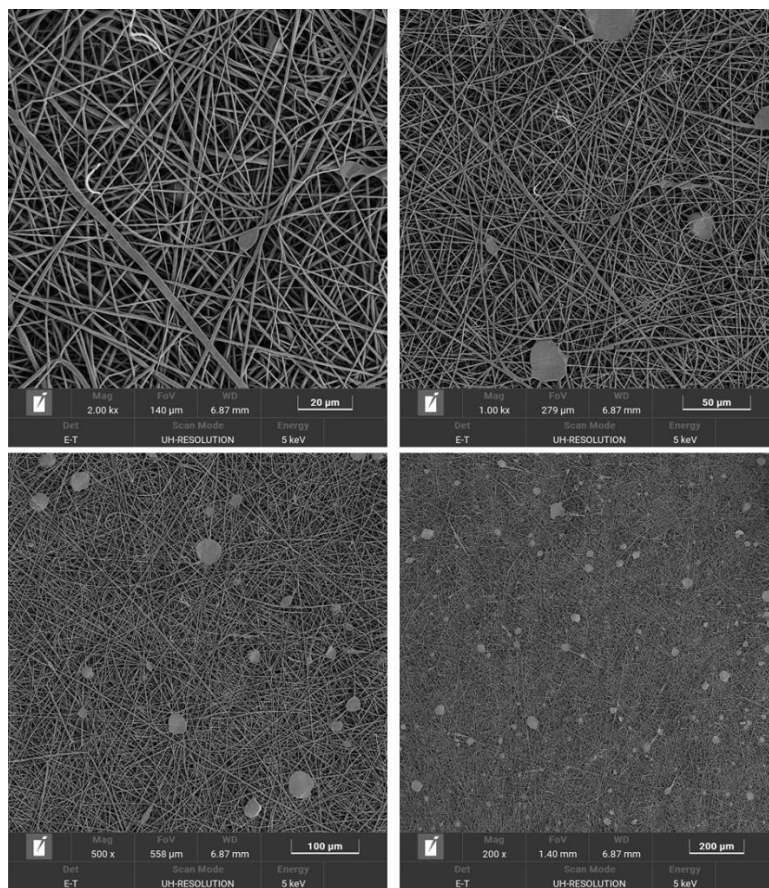

**Fig. S10** SEM images of electrospun mats prepared from solutions containing **P1**.

### 3. Spectroscopic NMR Data

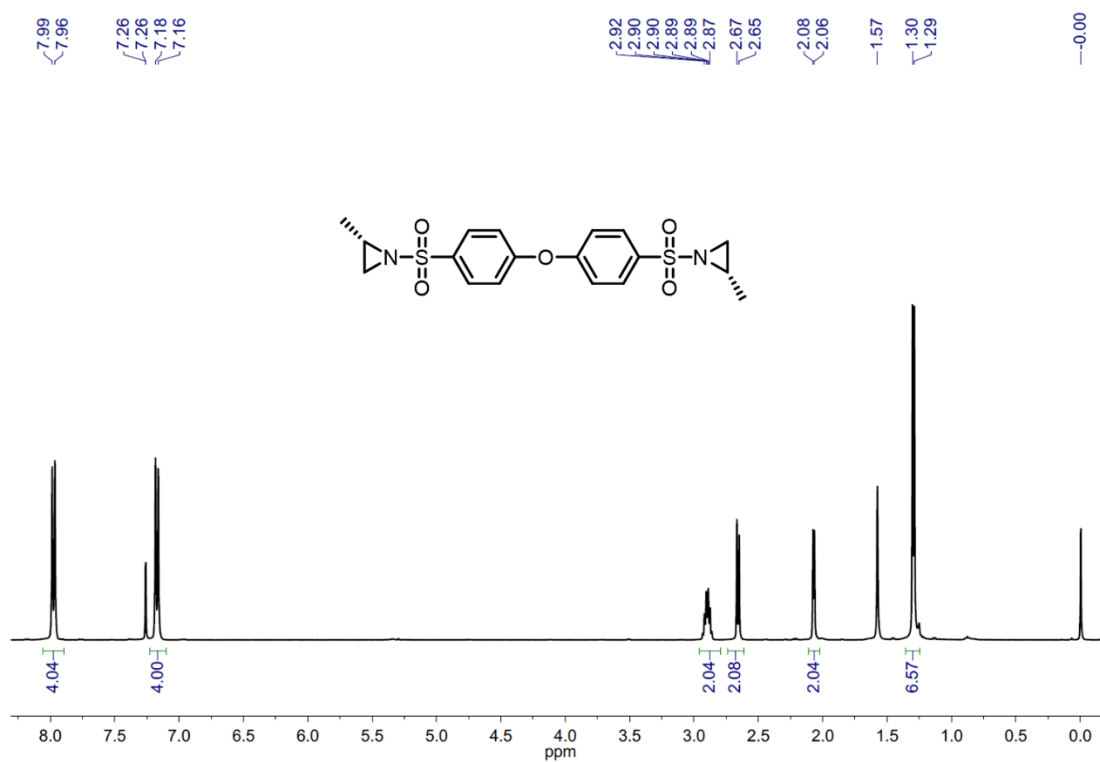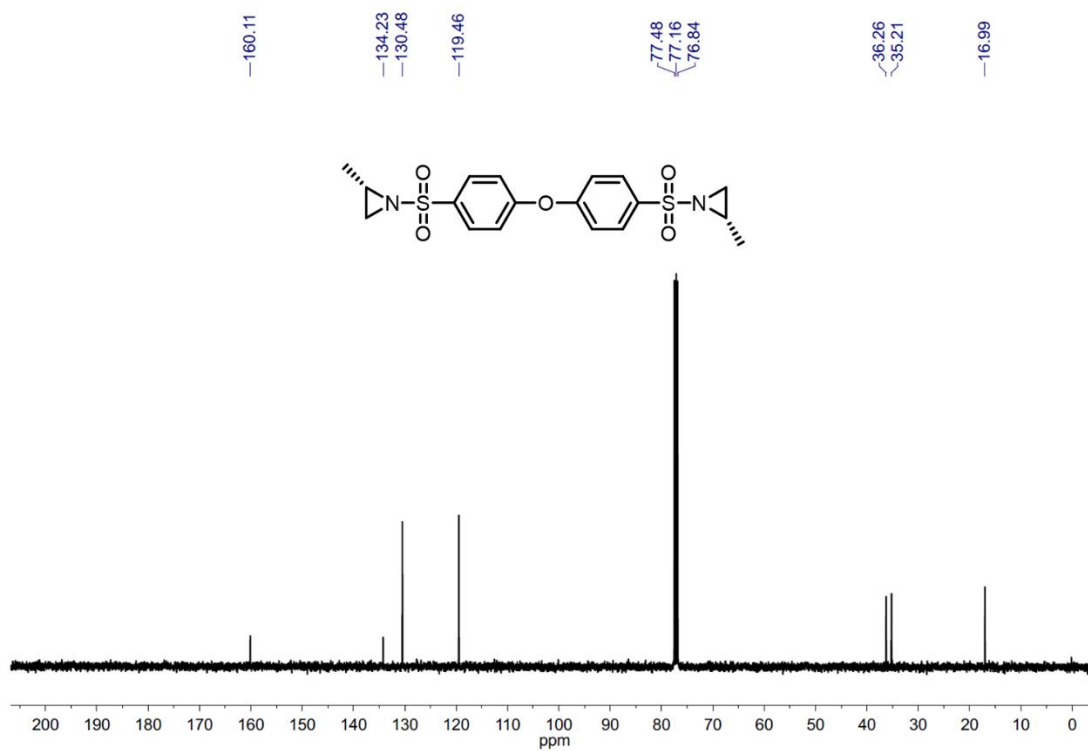



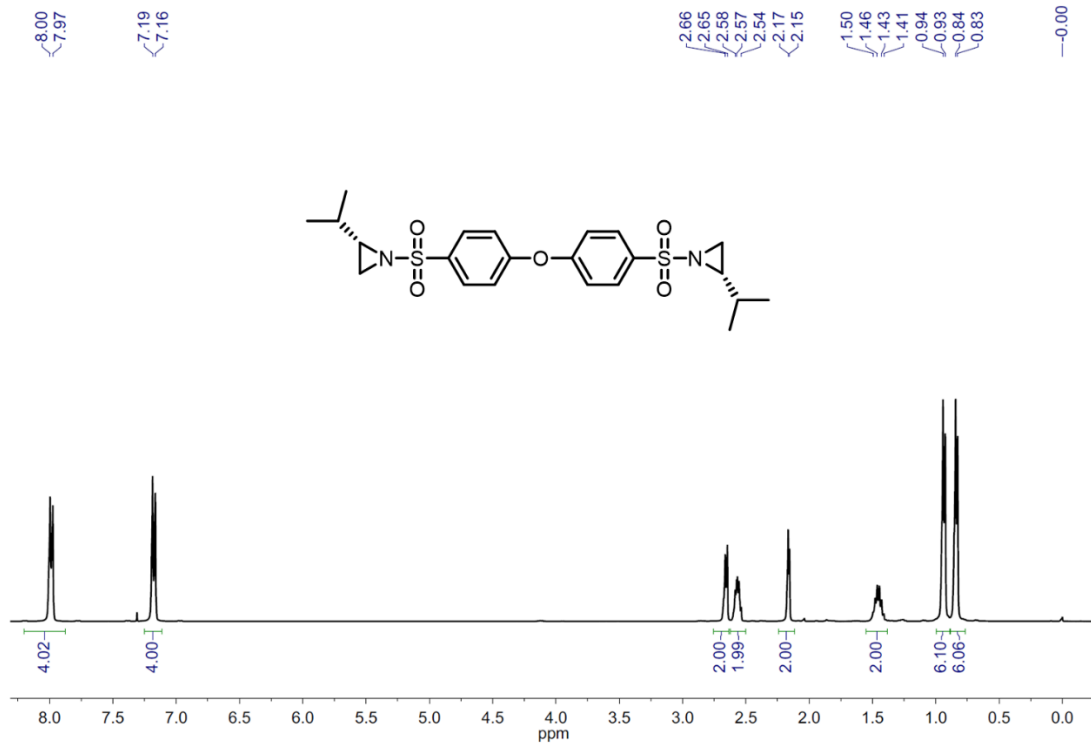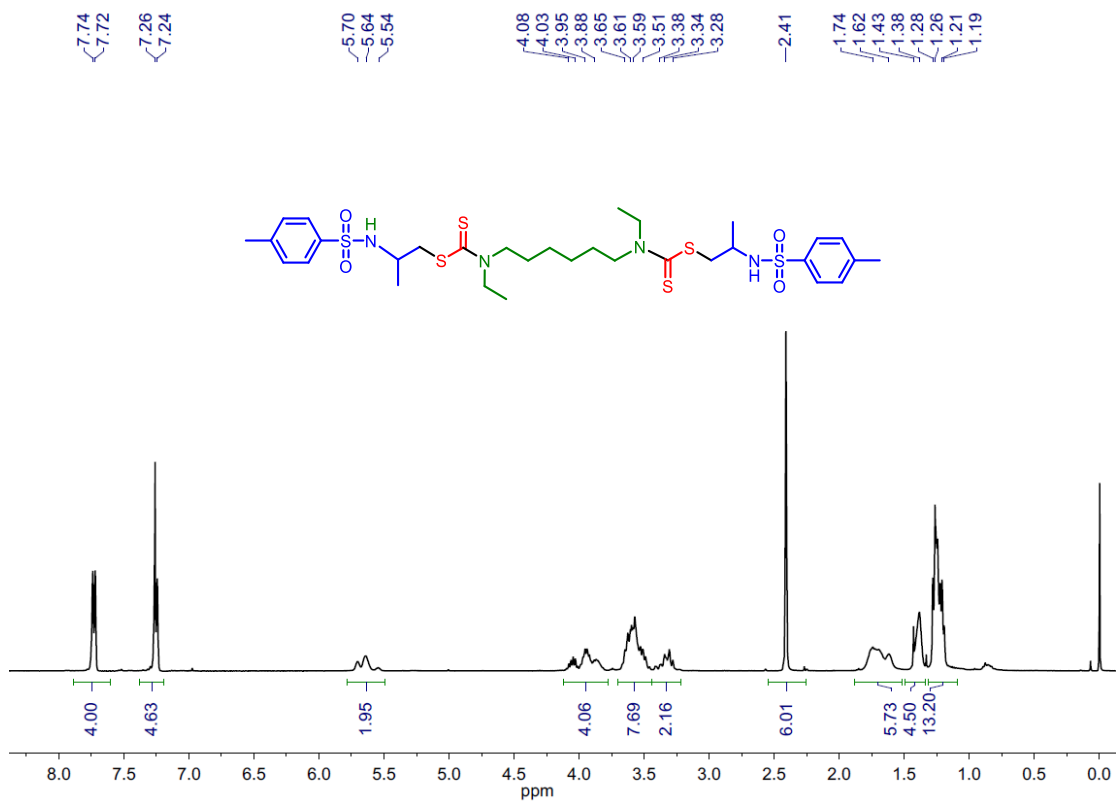

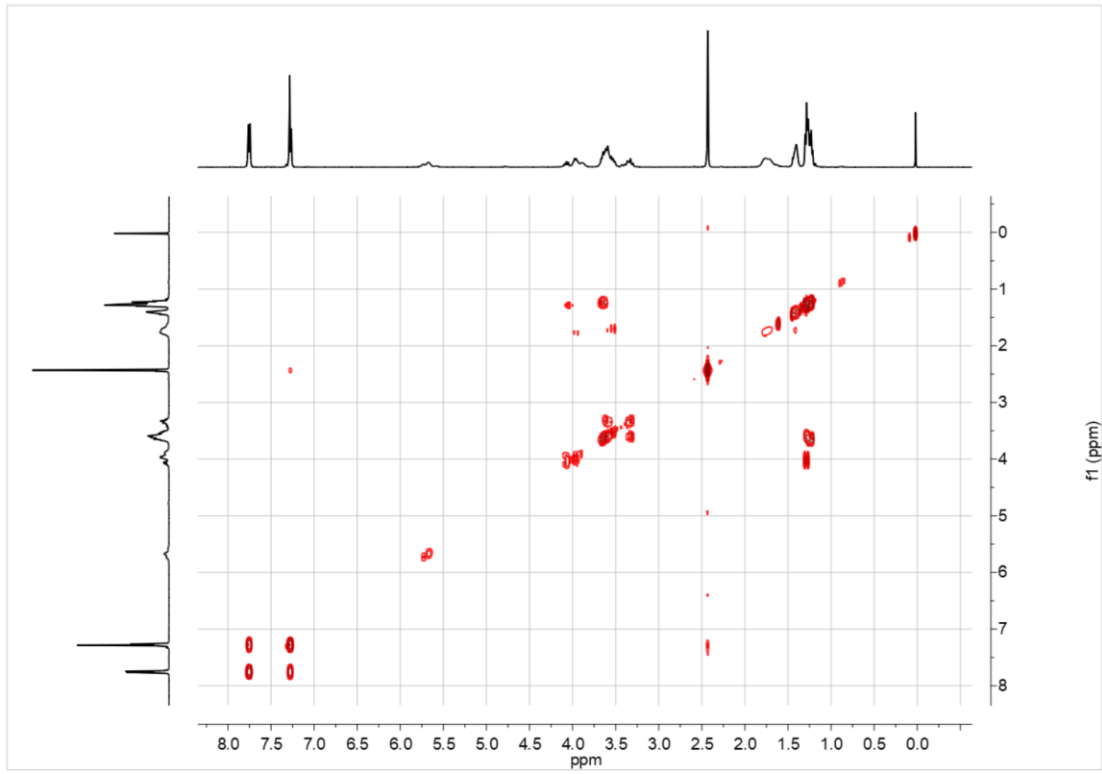

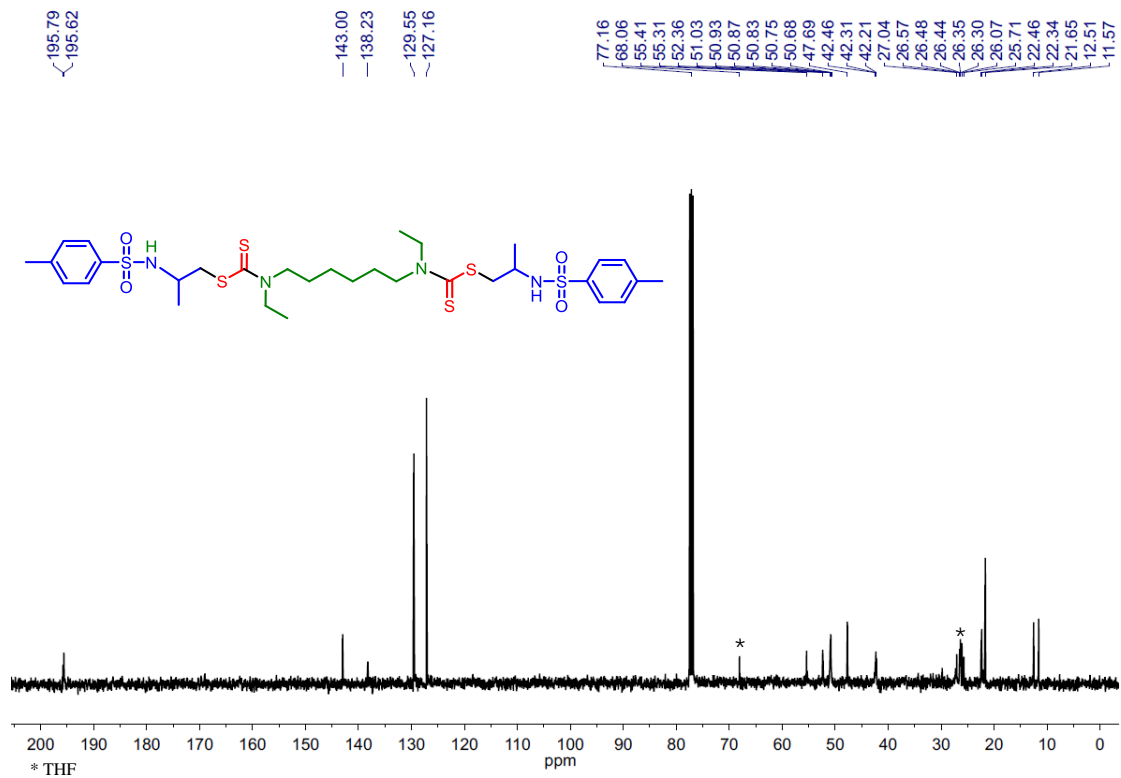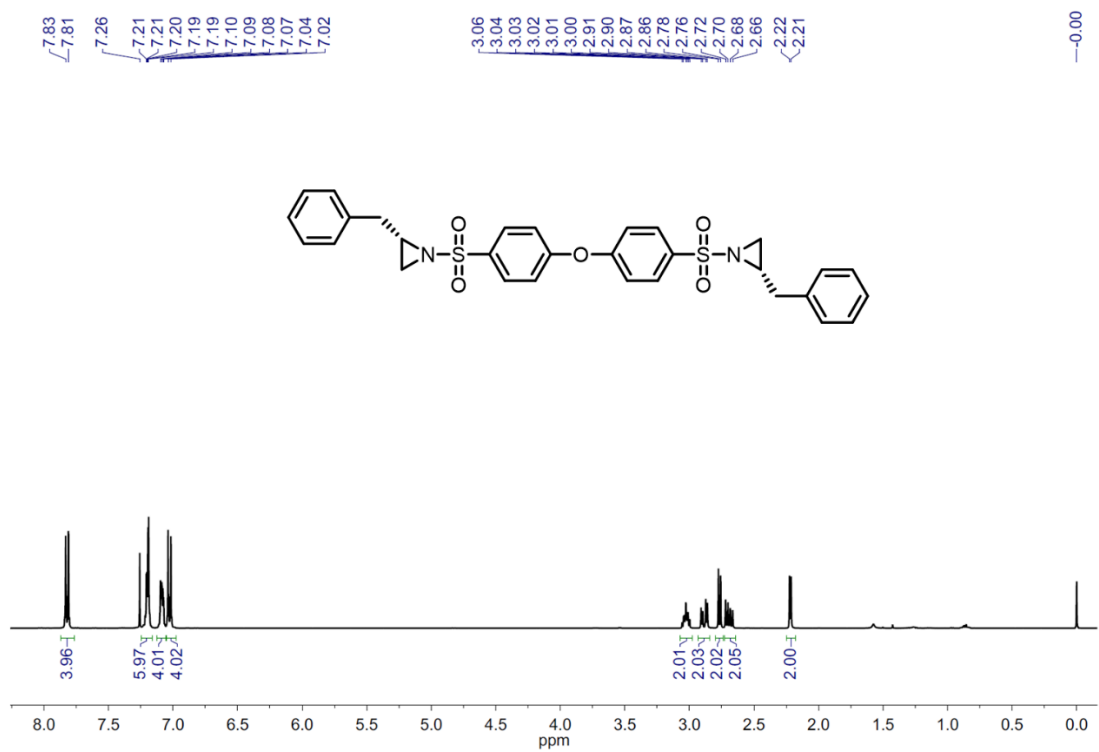

159.88  
159.88  
148.49  
137.14  
137.14  
128.88  
126.79  
119.24  
119.24

77.48  
77.16  
76.84

41.70  
37.59  
33.18

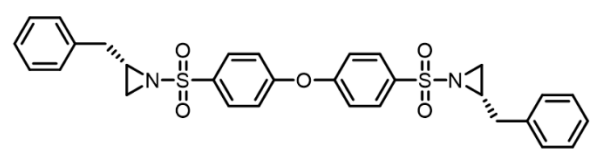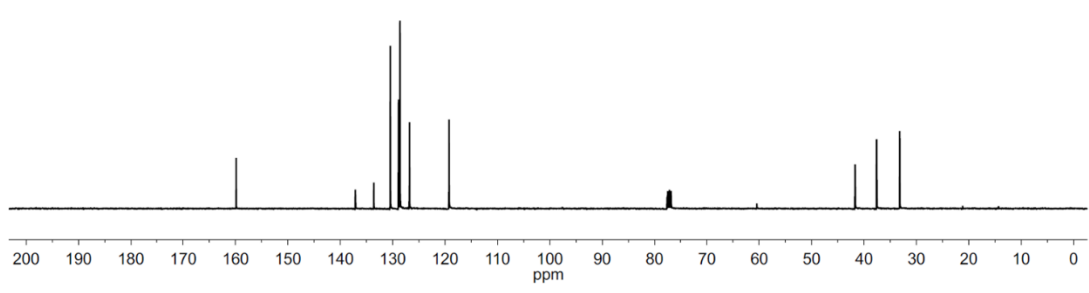



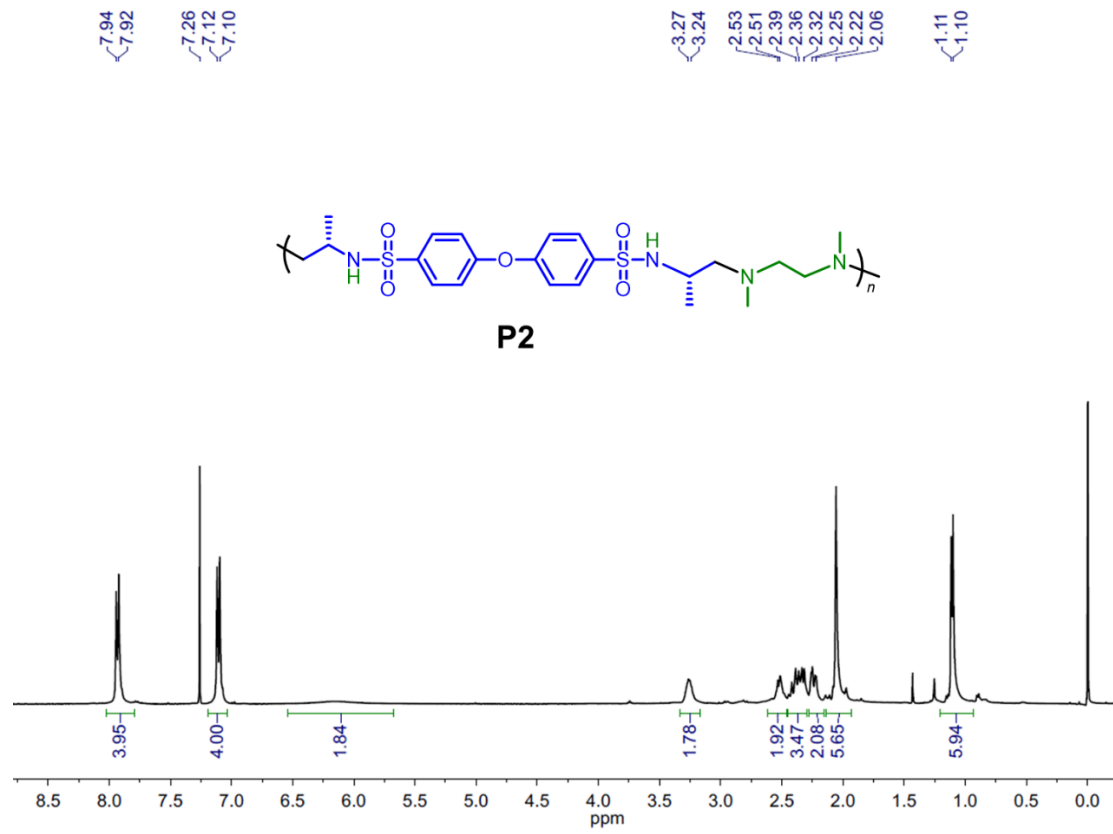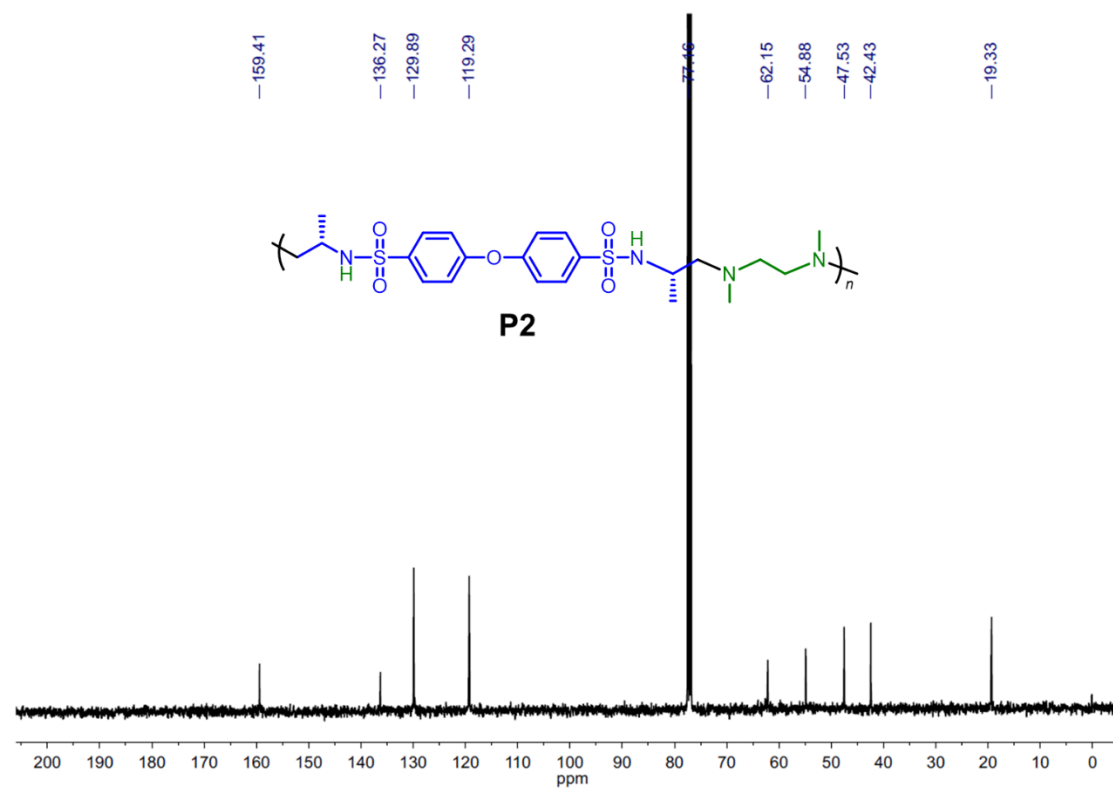

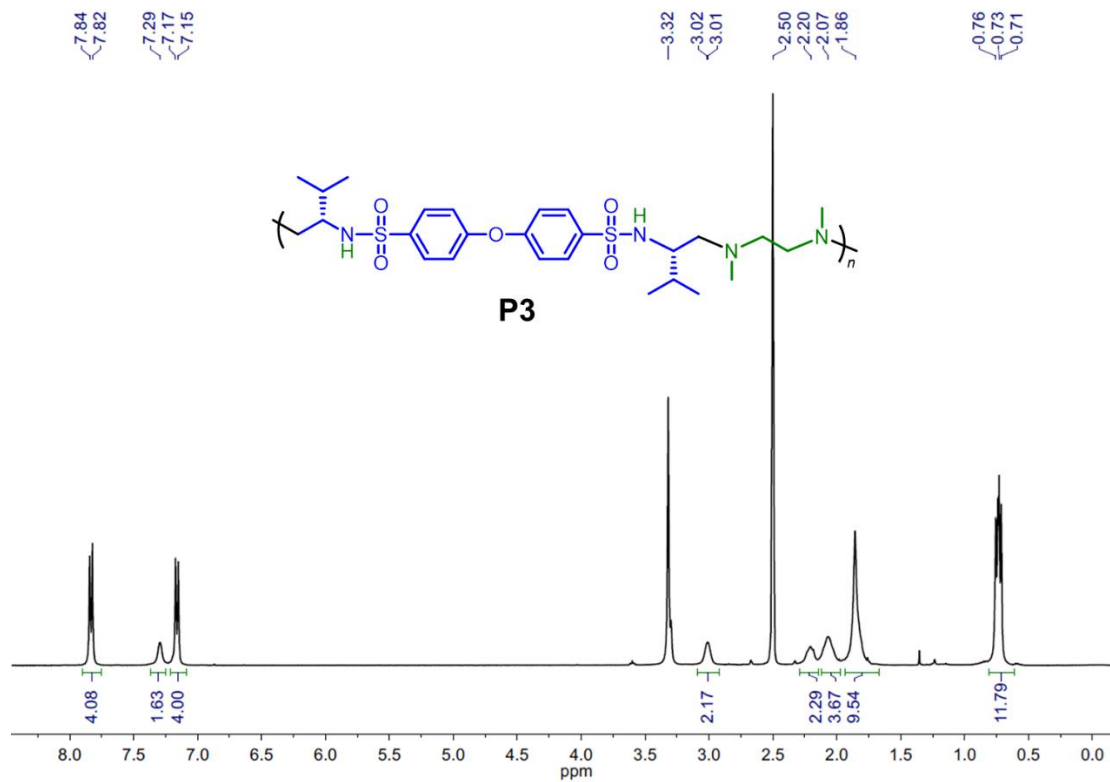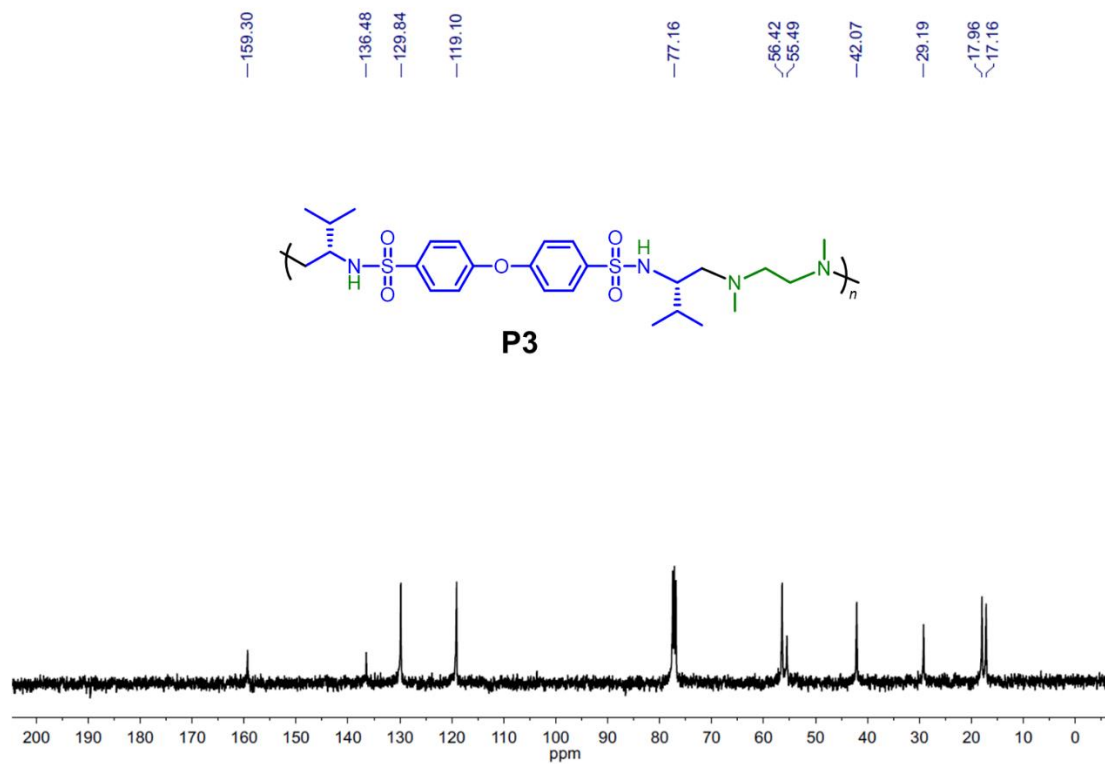

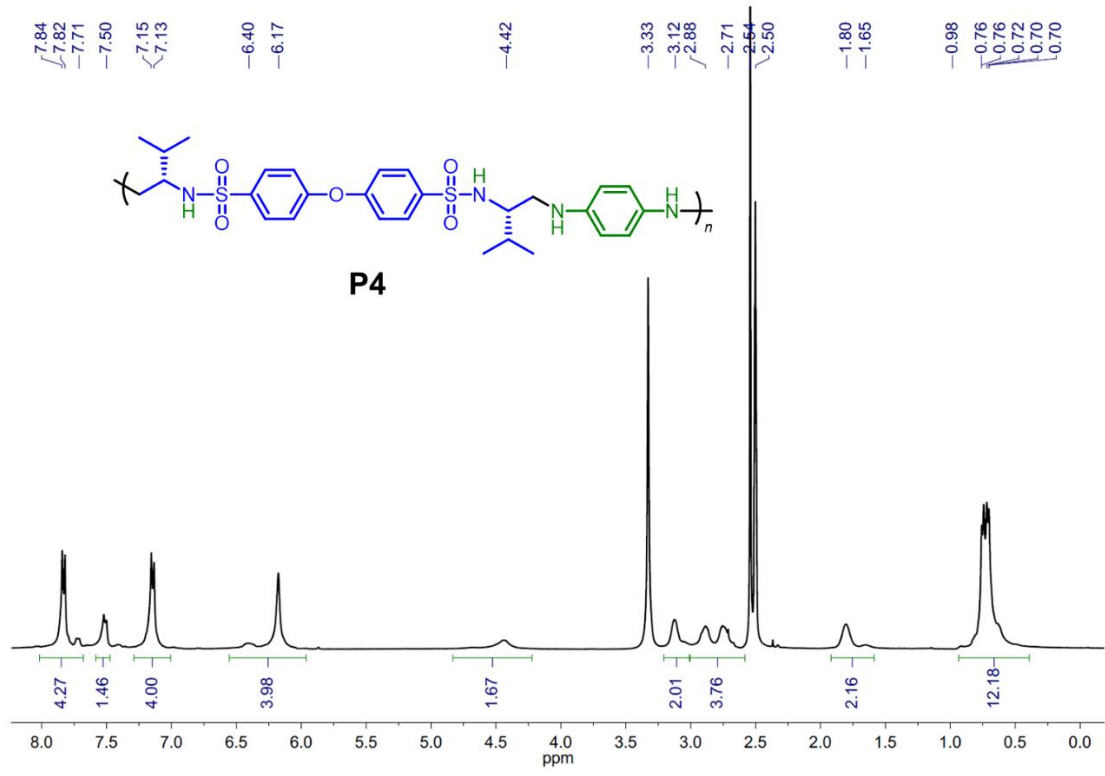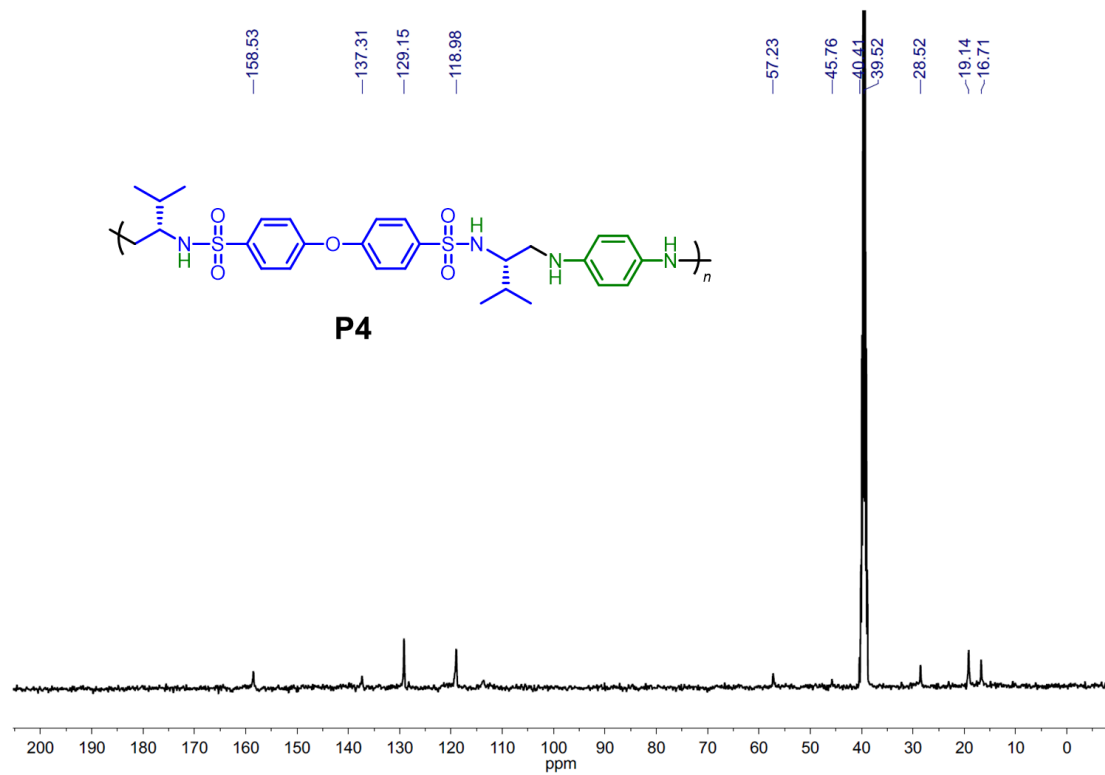



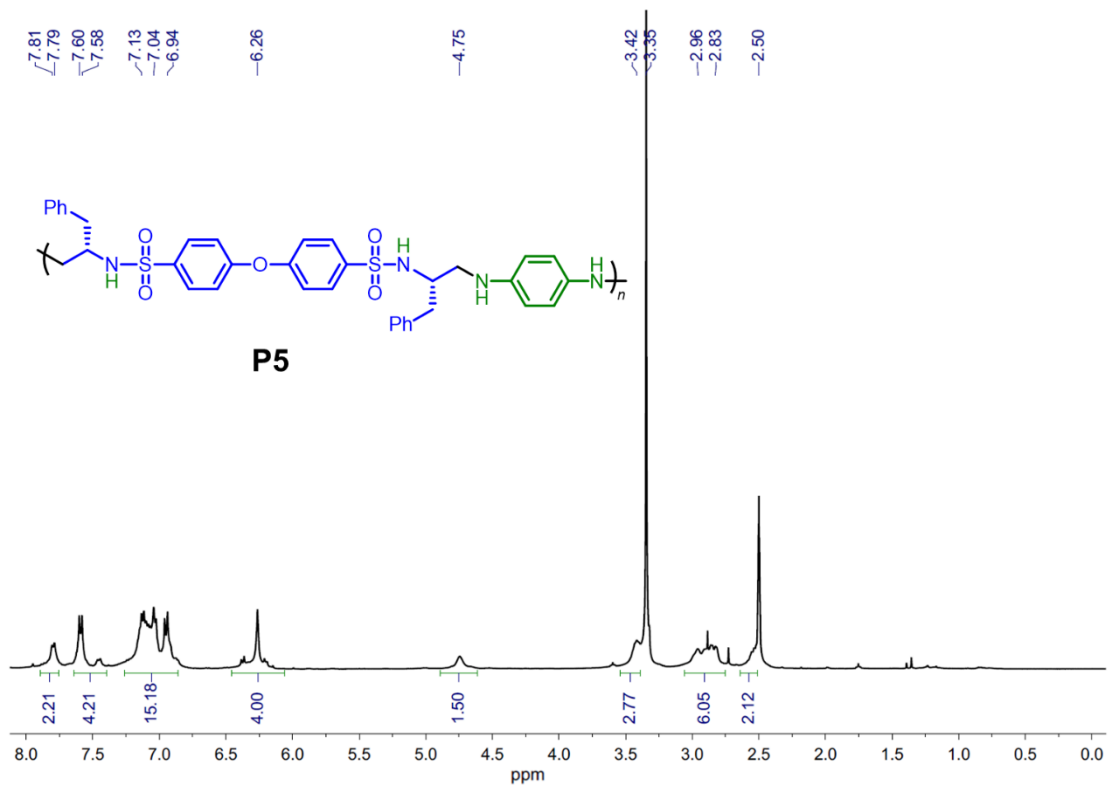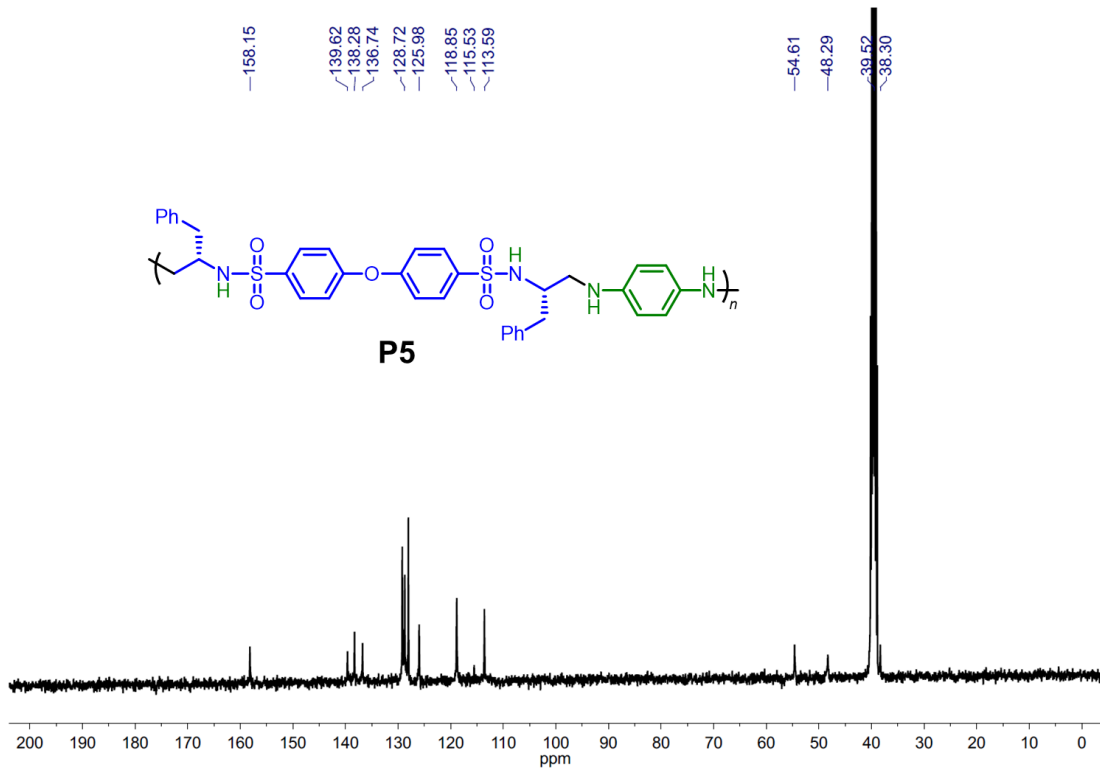

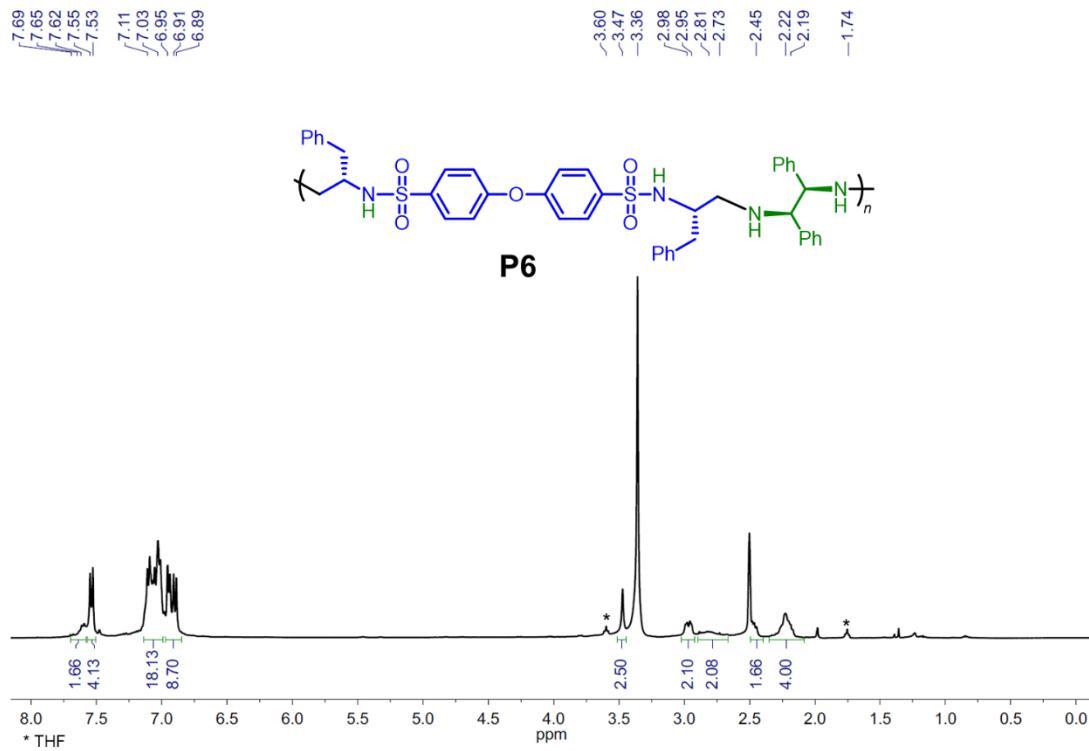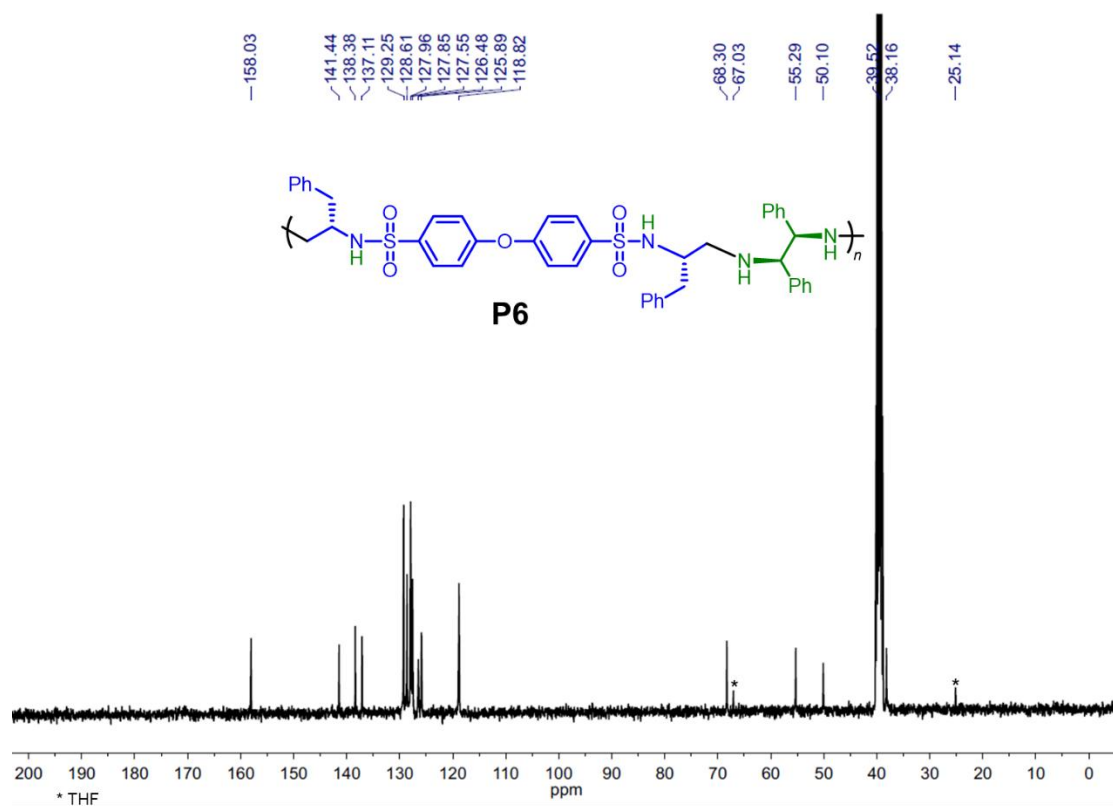

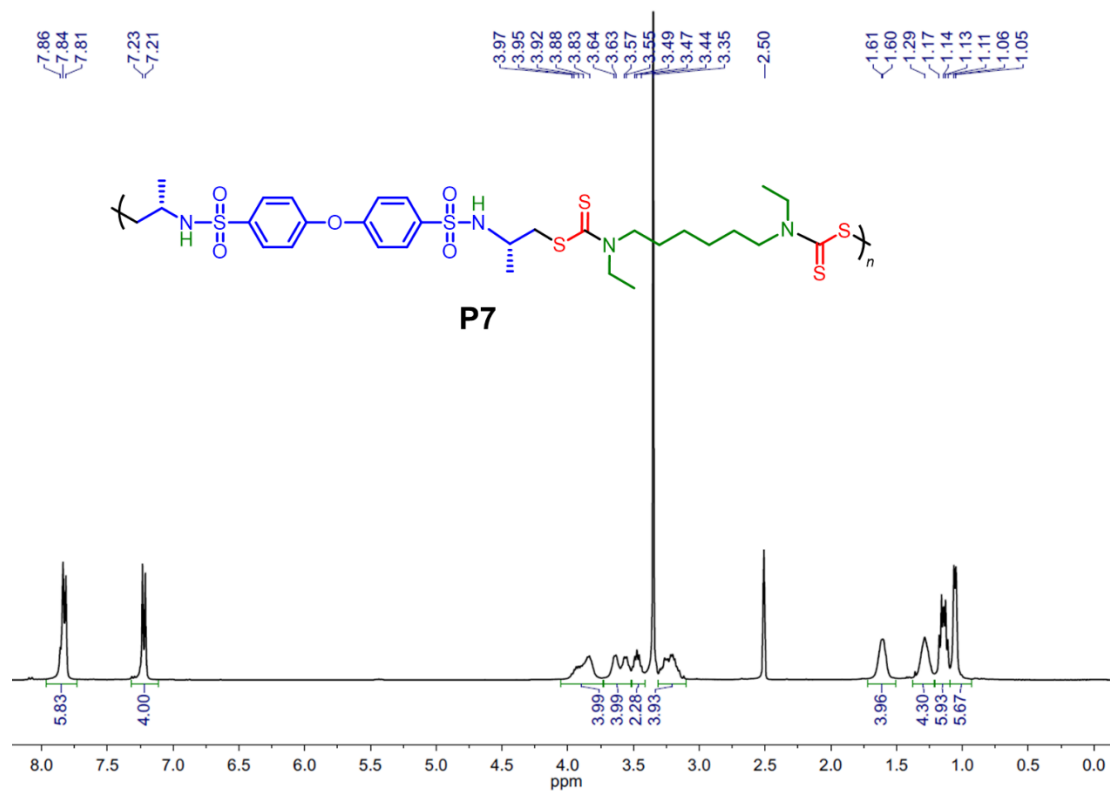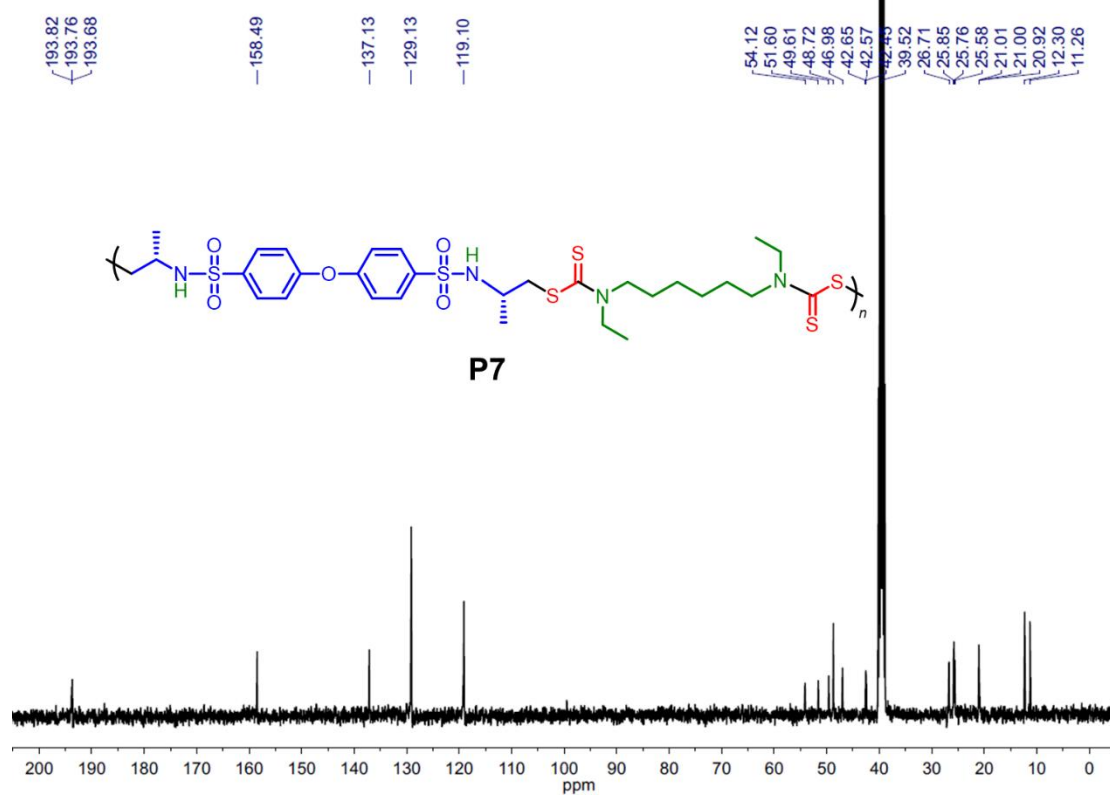

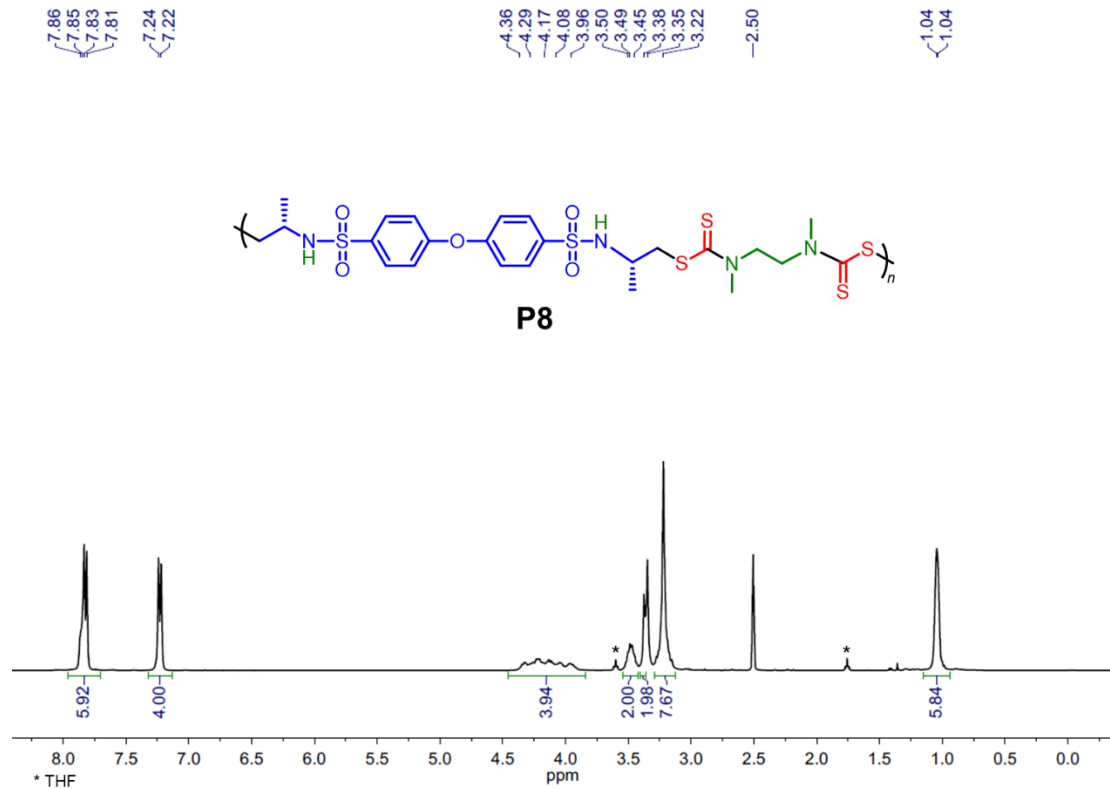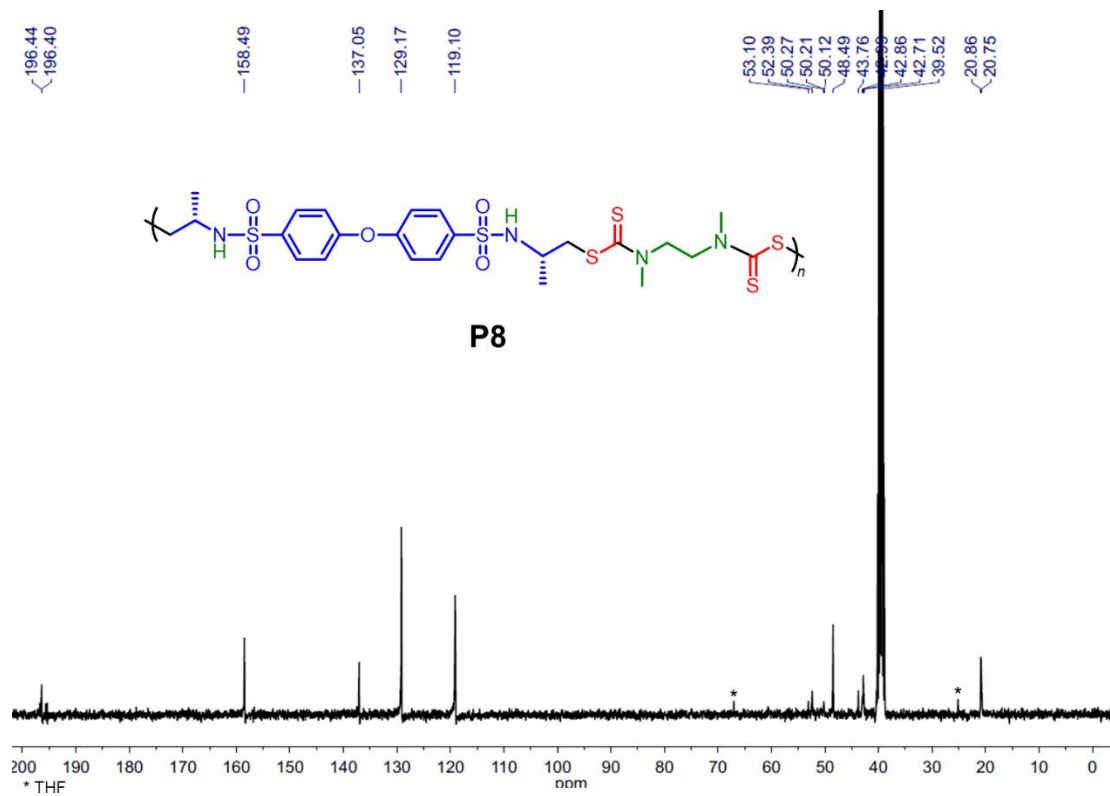

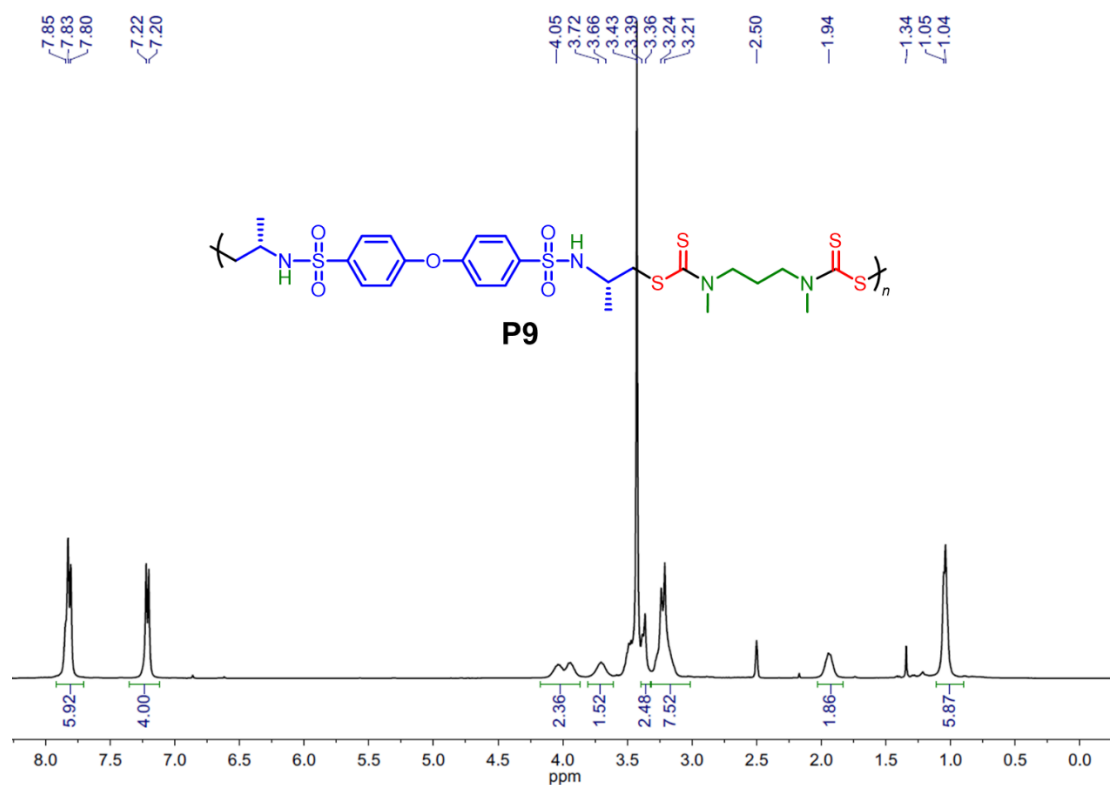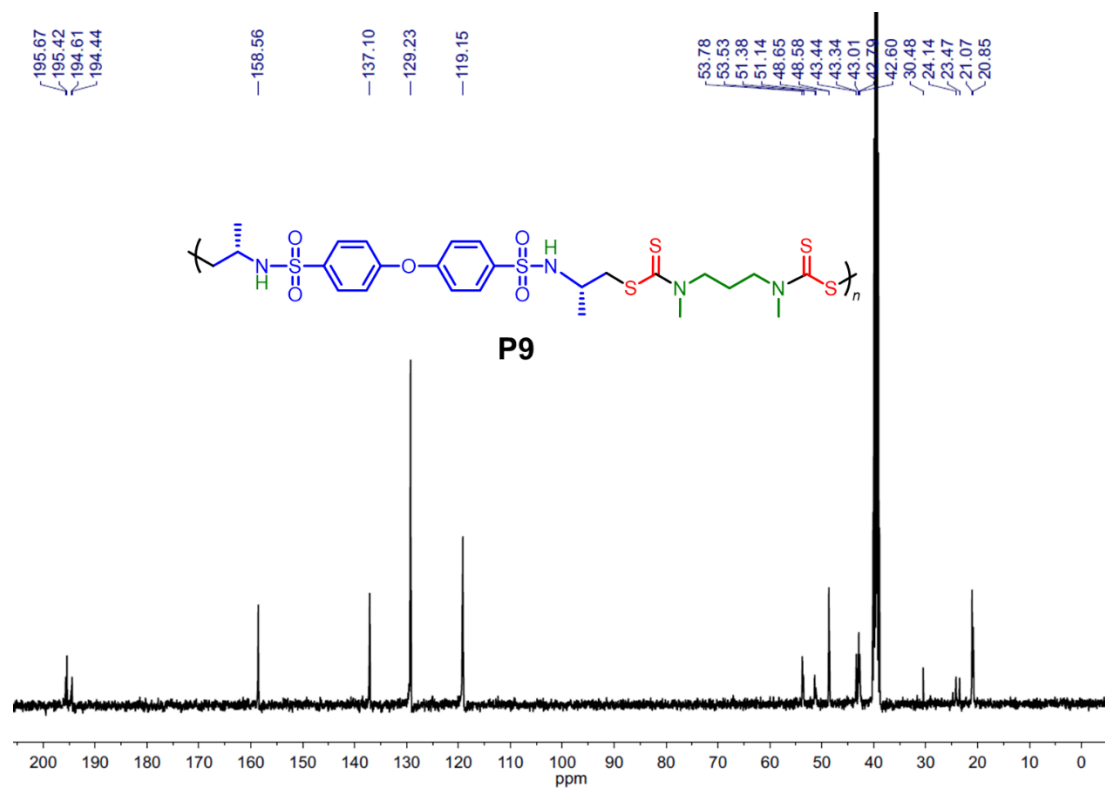

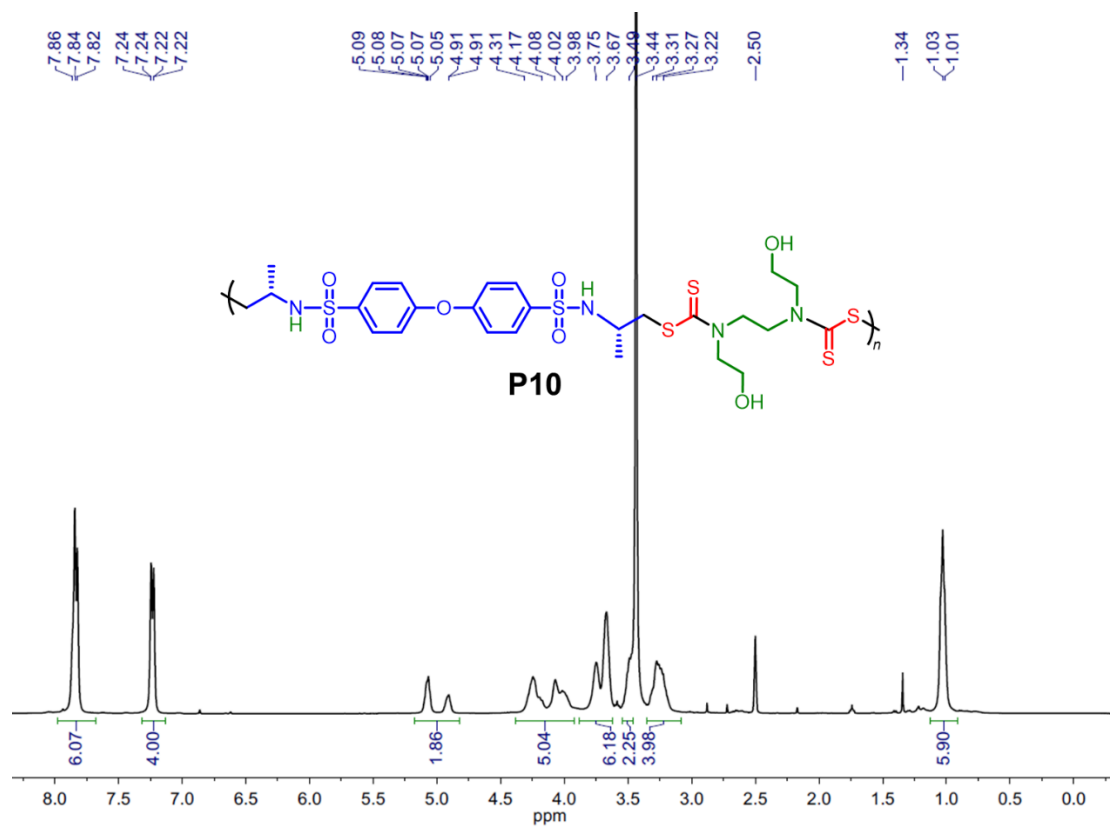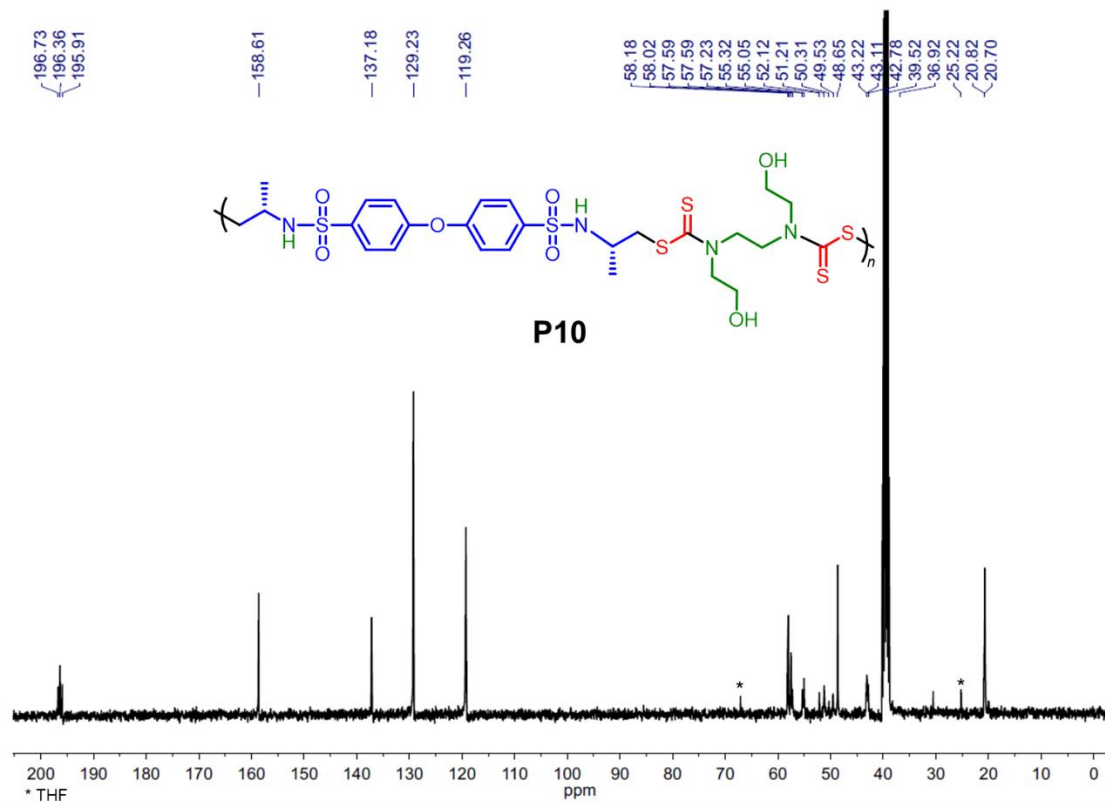

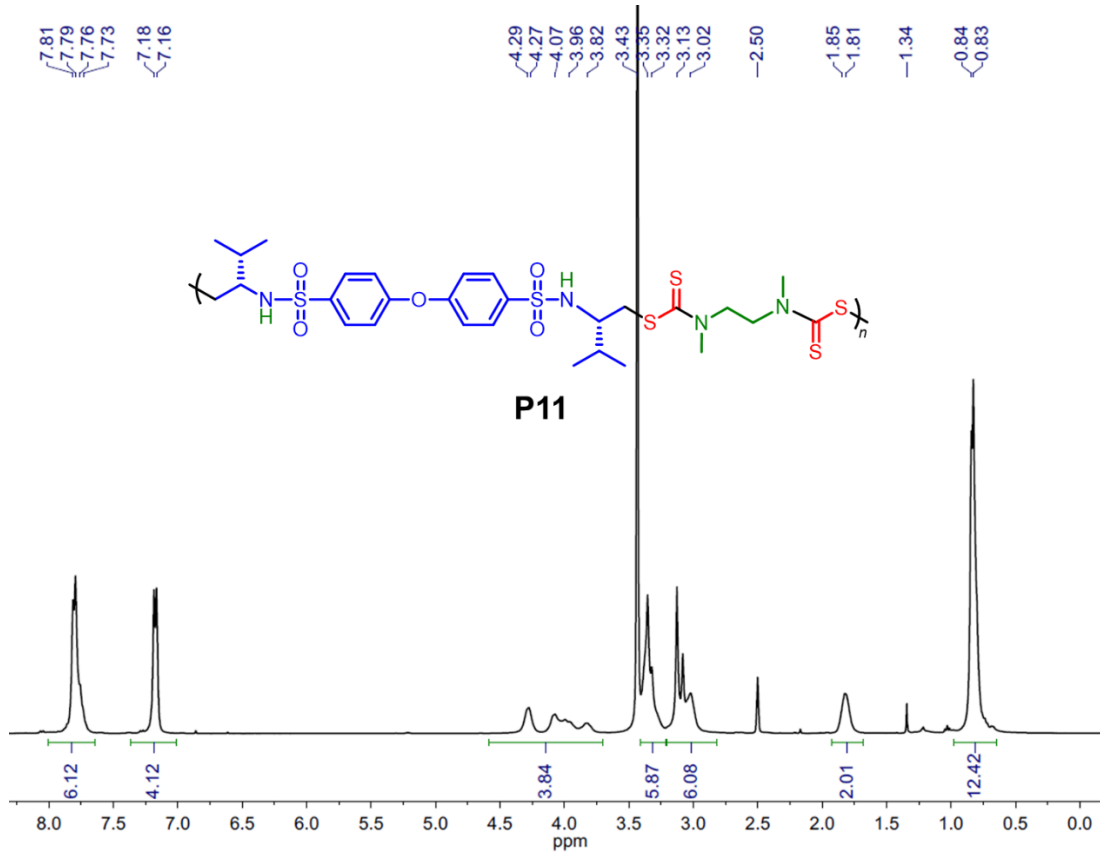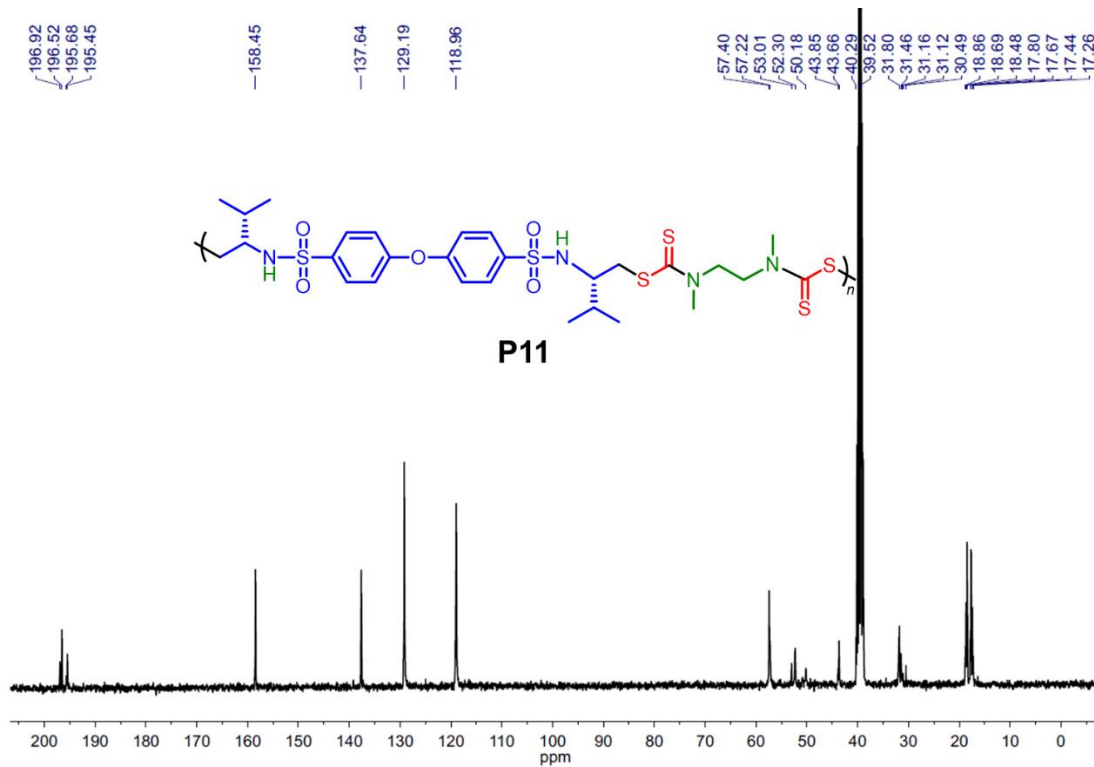

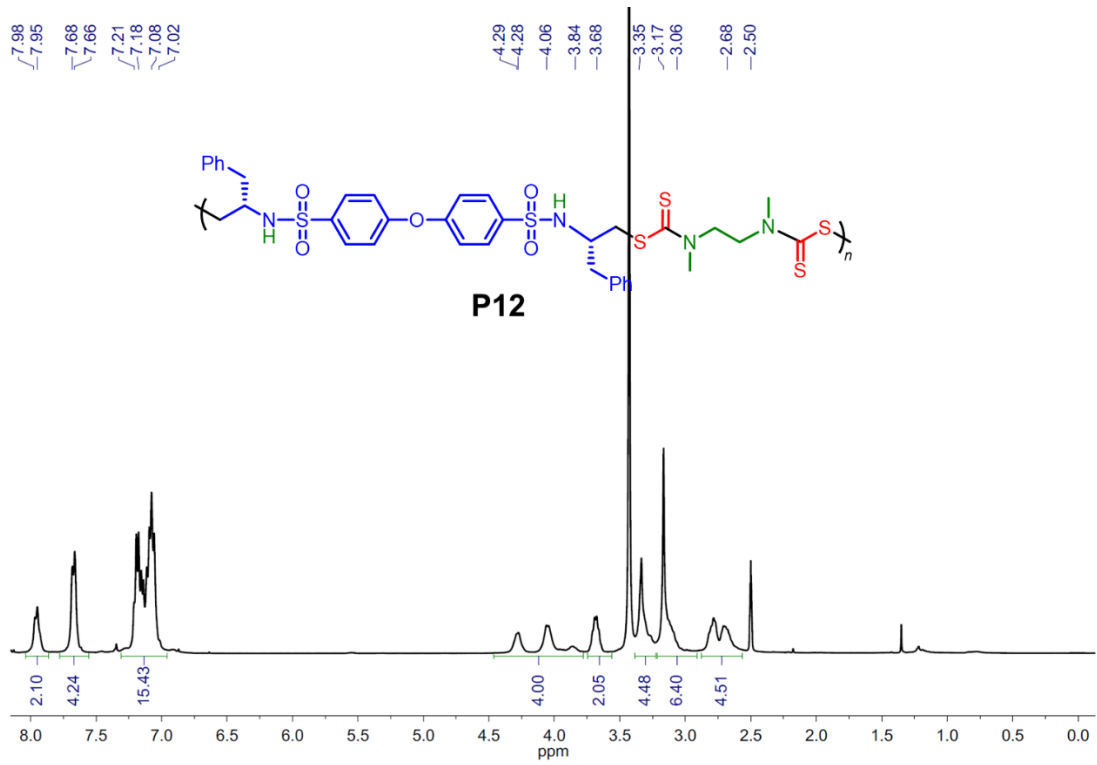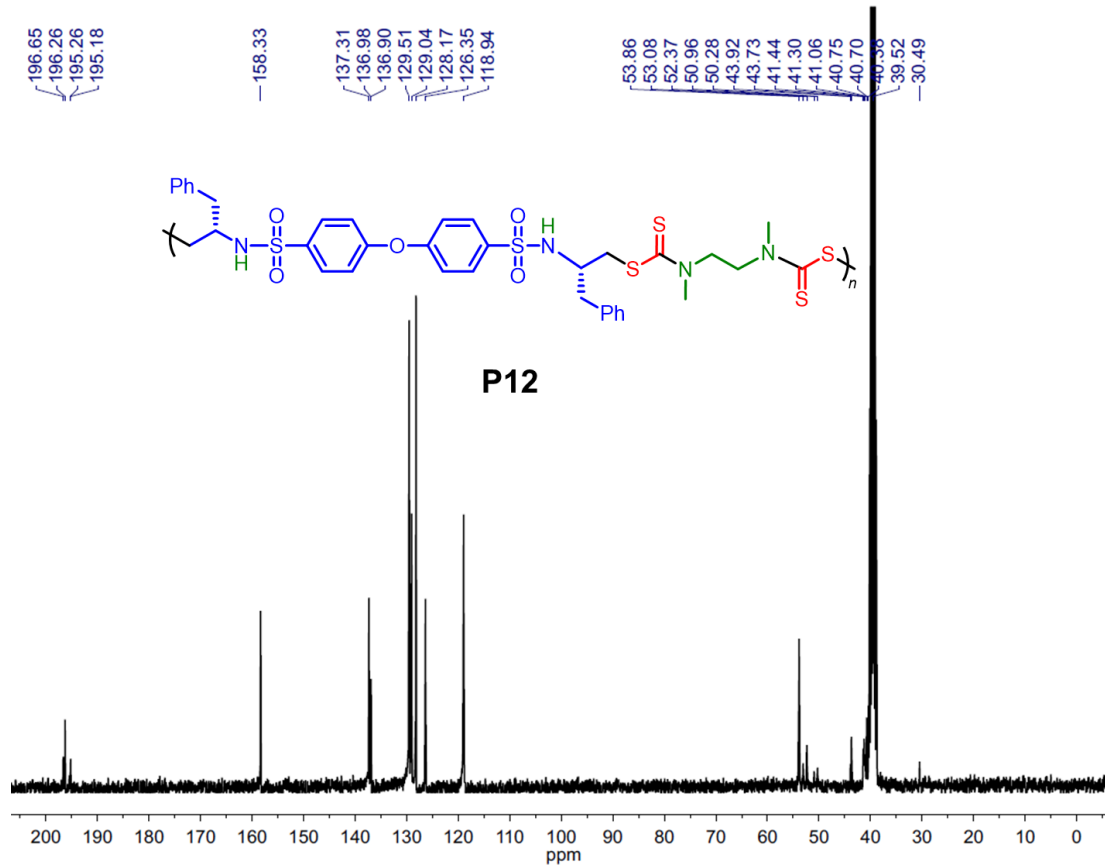



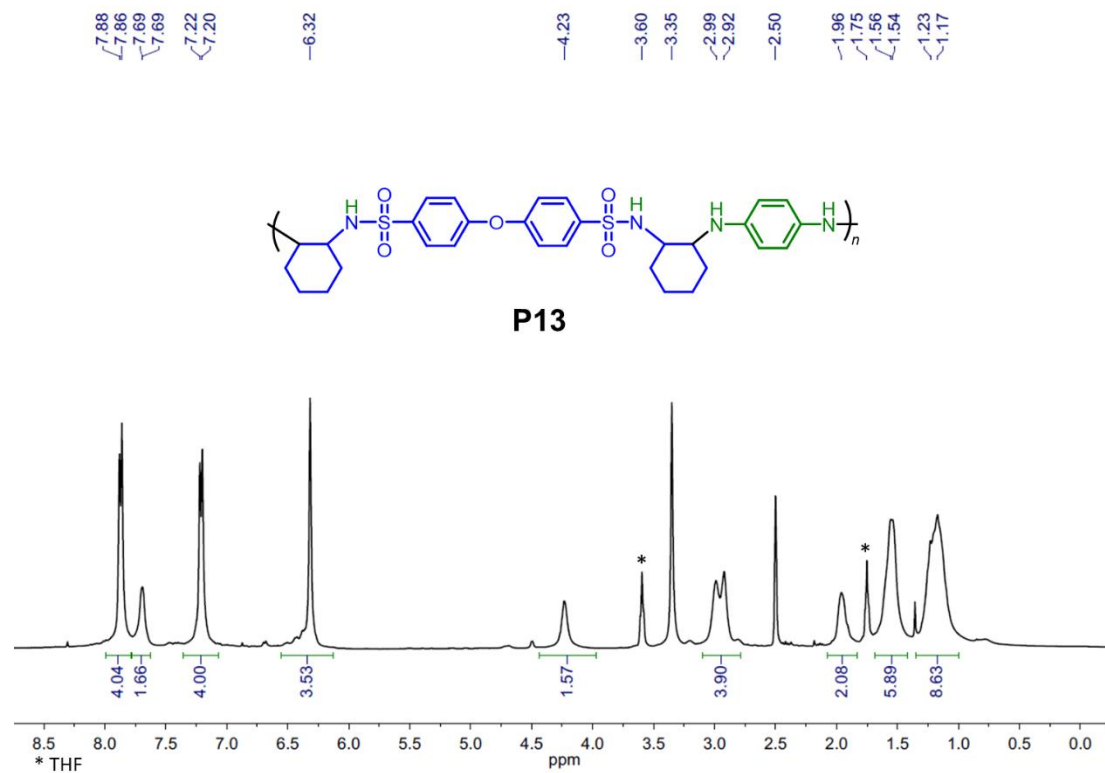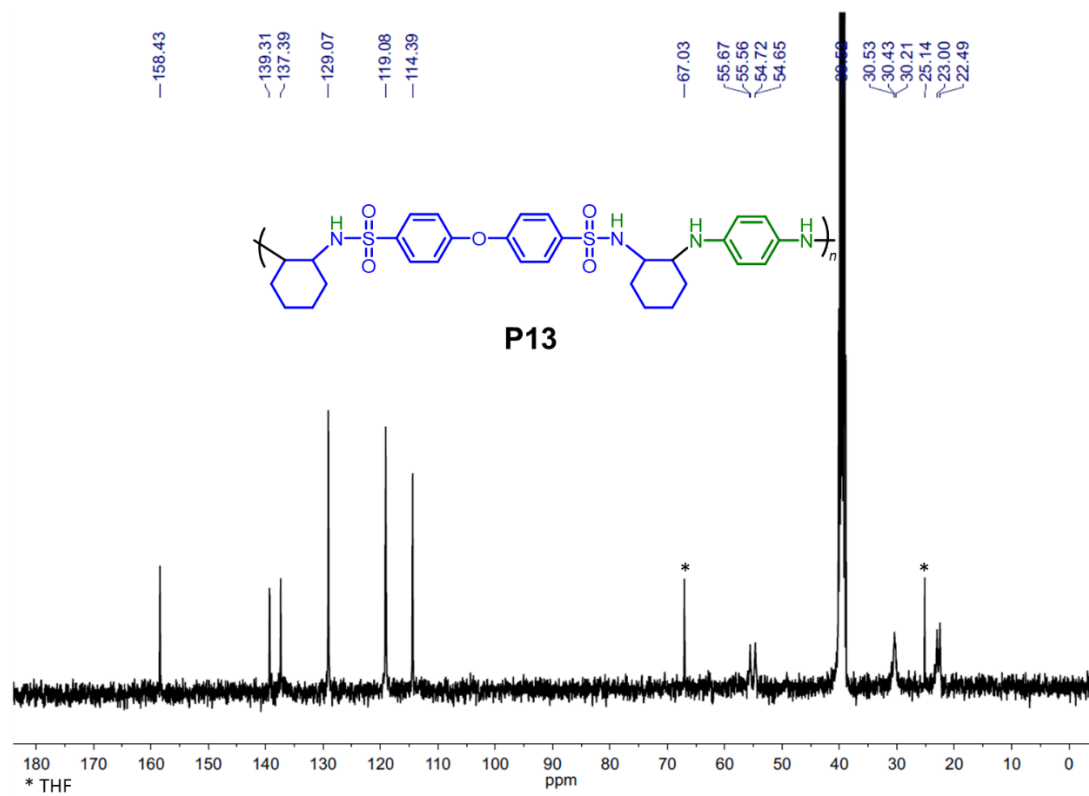

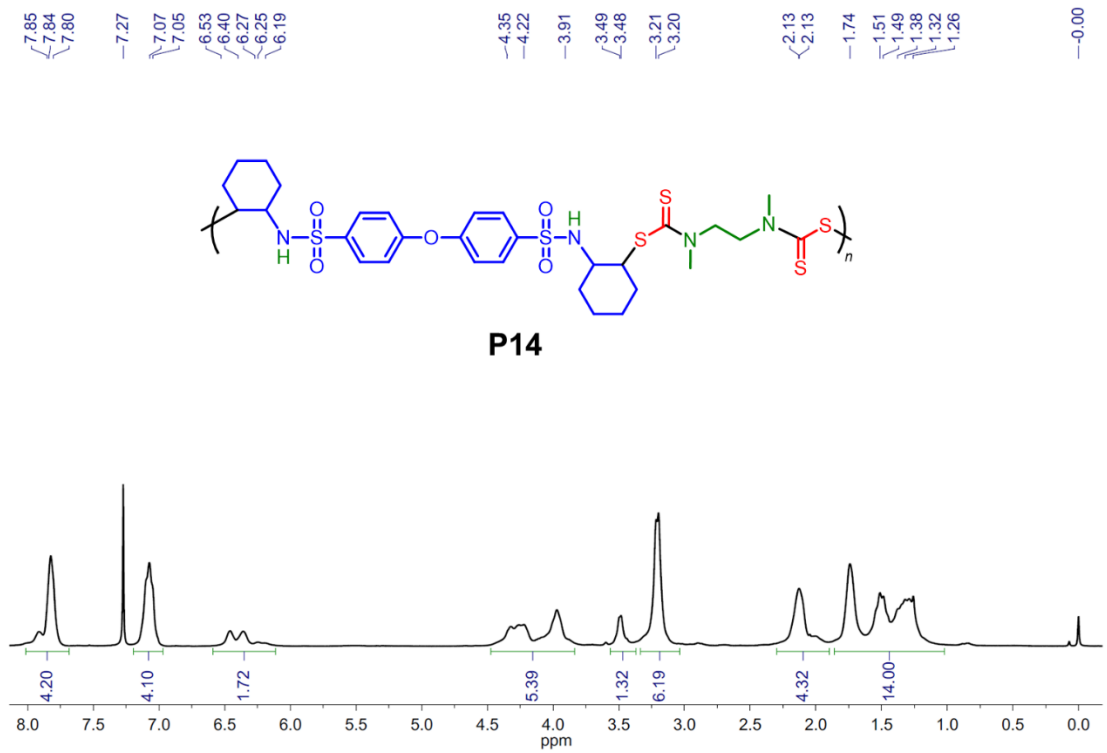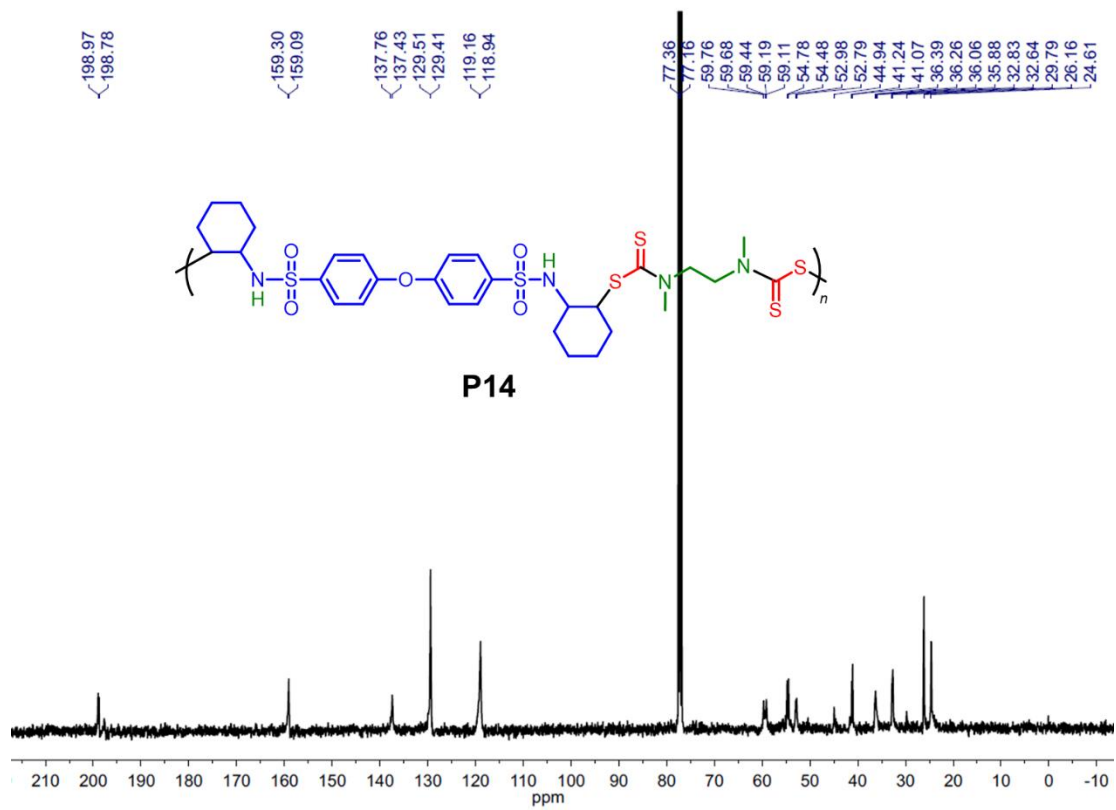

## 4. Full SEC (DMF, 60 °C) Traces

### P1 Chromatogram Plot

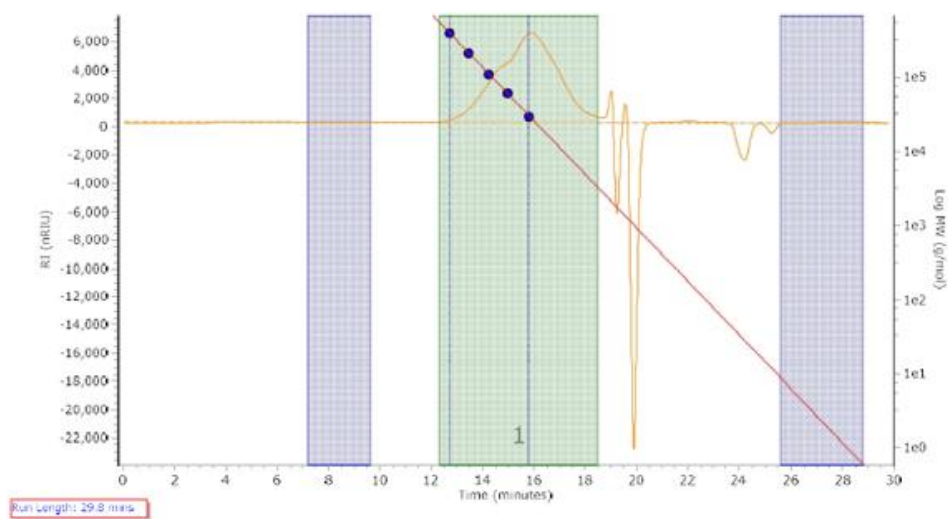

### Distribution Plot

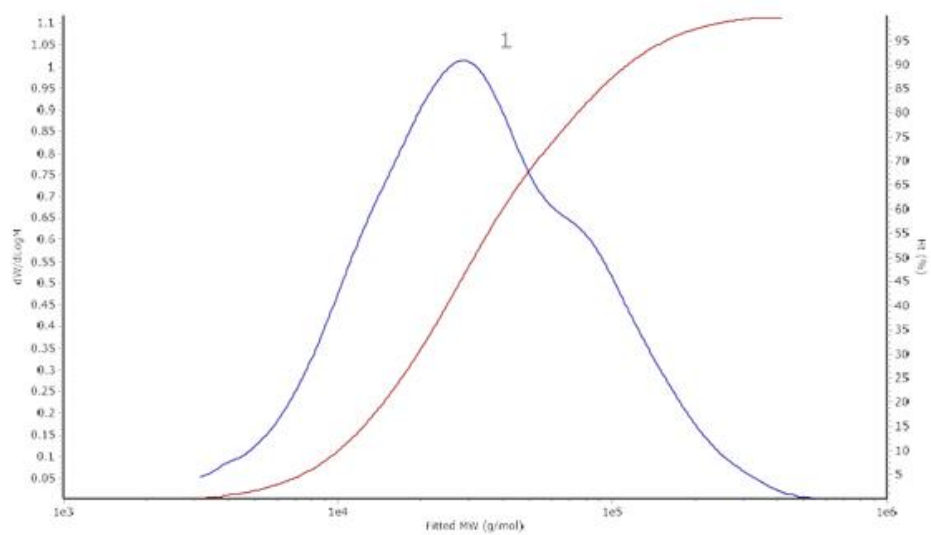

P2

Chromatogram Plot

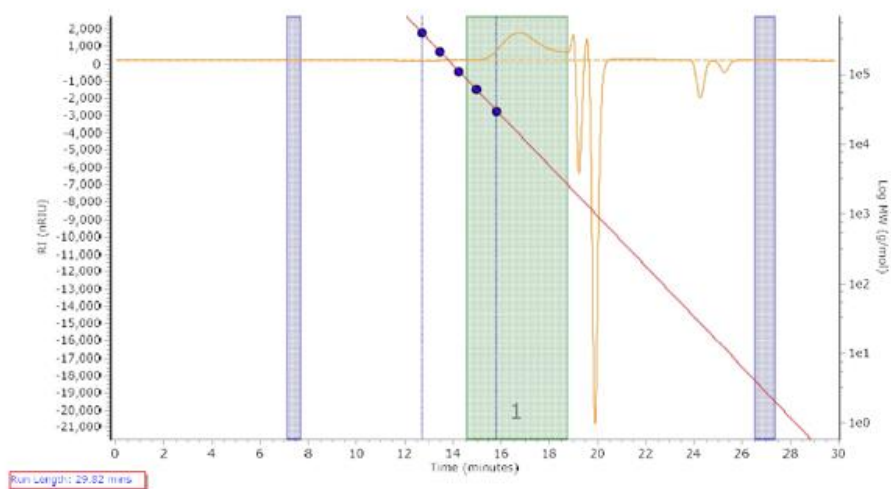

Distribution Plot

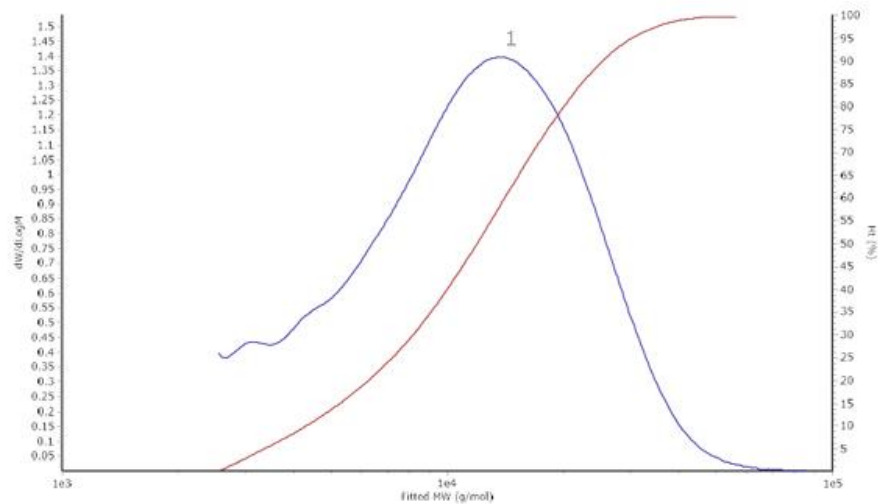

P3

Chromatogram Plot

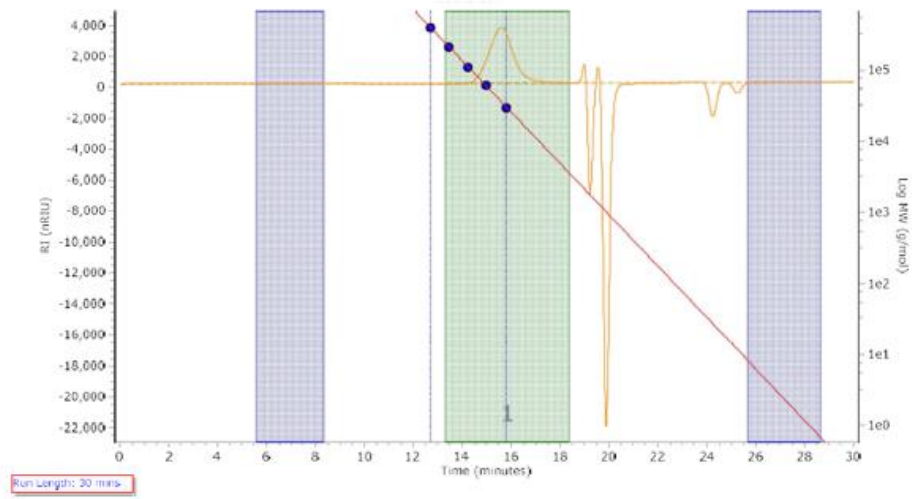

Distribution Plot

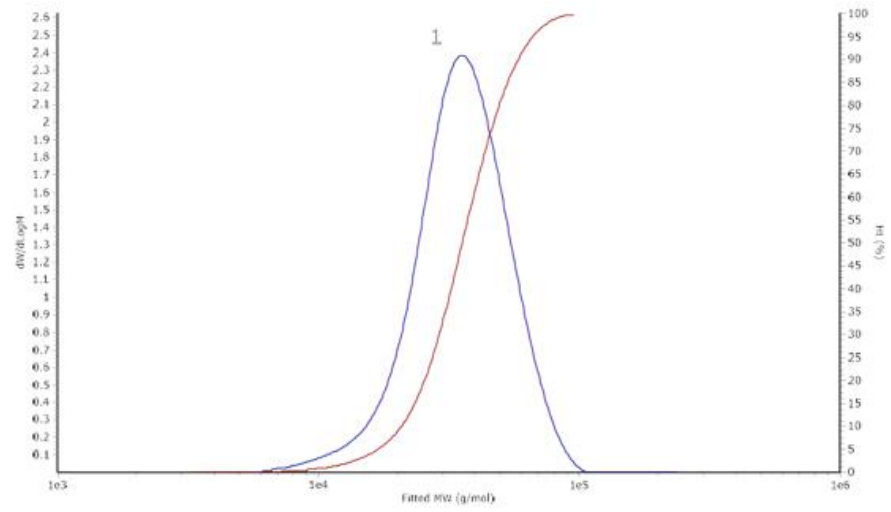

P4

Chromatogram Plot

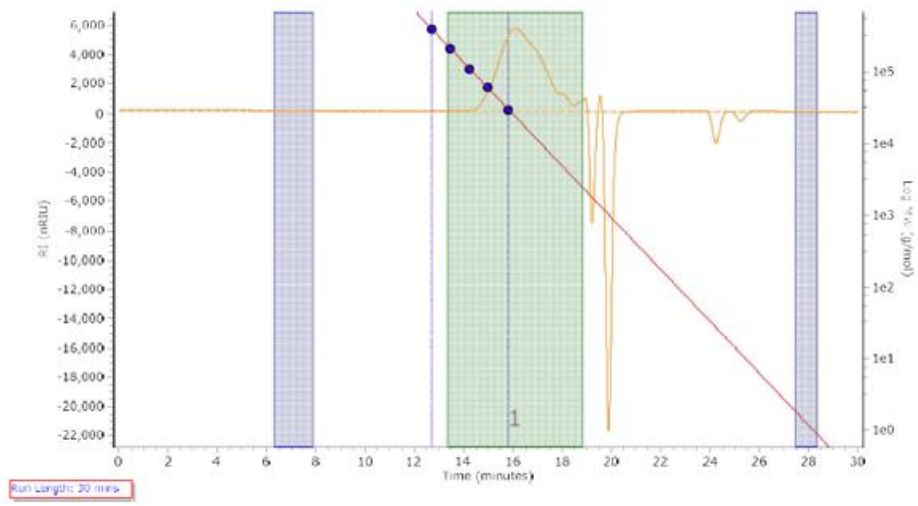

Distribution Plot

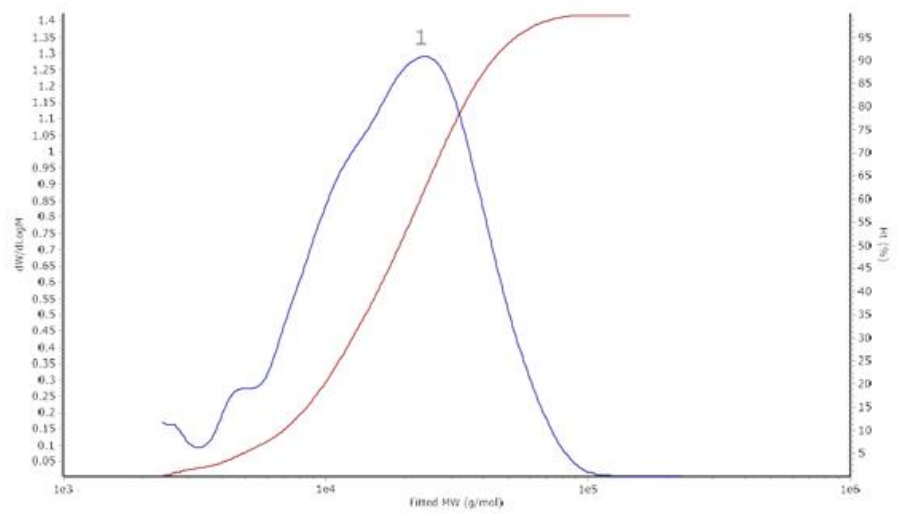

P5

Chromatogram Plot

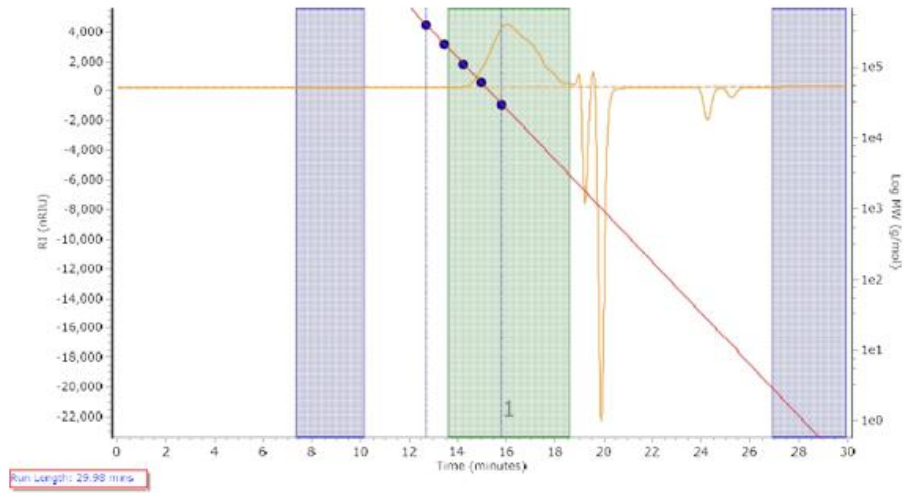

Distribution Plot

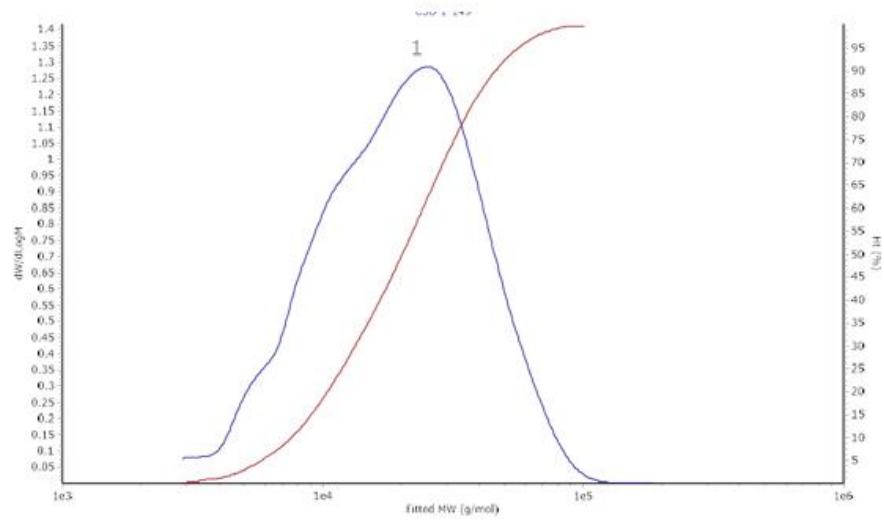

P6

Chromatogram Plot

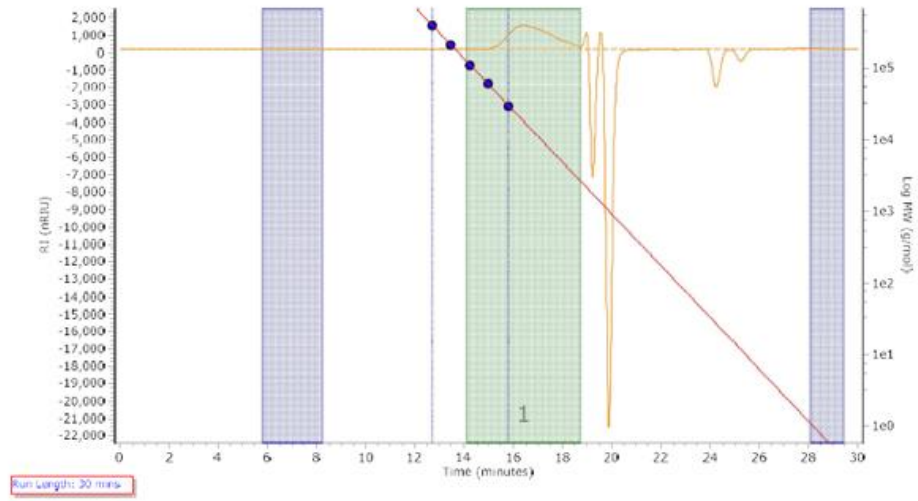

Distribution Plot

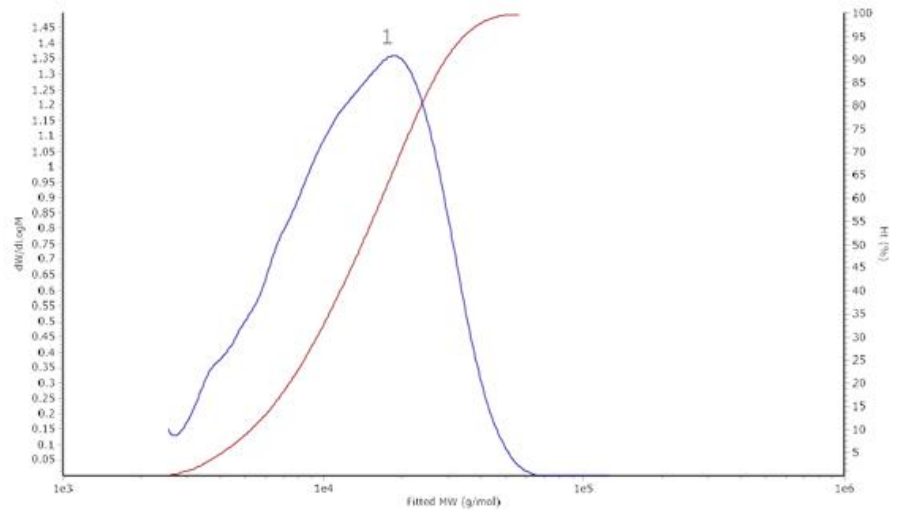



P7

Chromatogram Plot

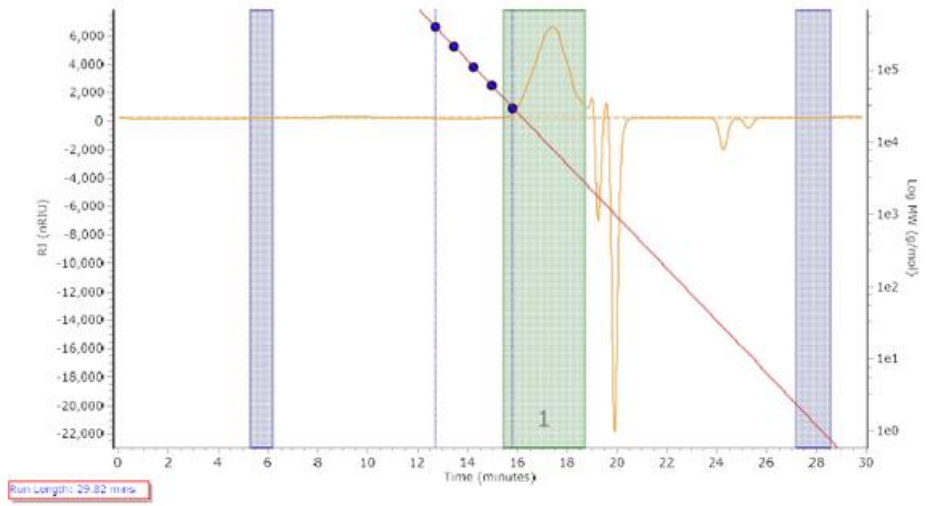

Distribution Plot

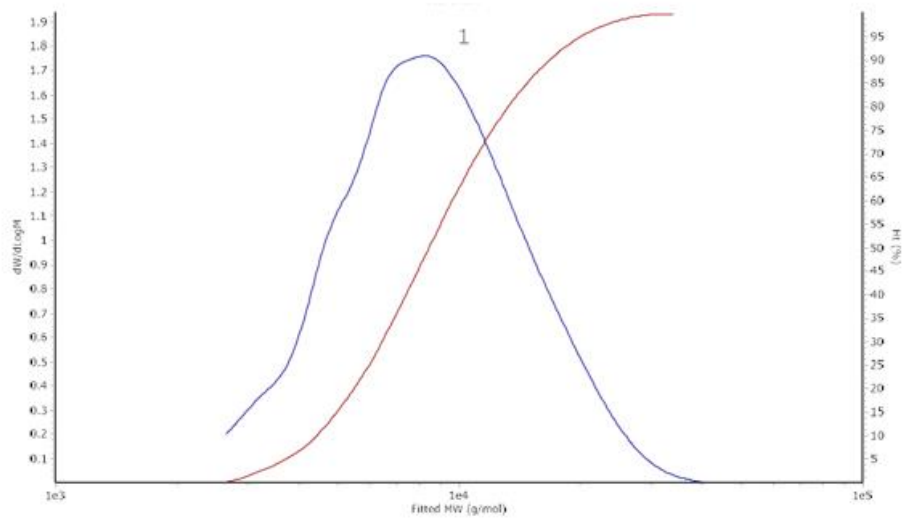

P8

Chromatogram Plot

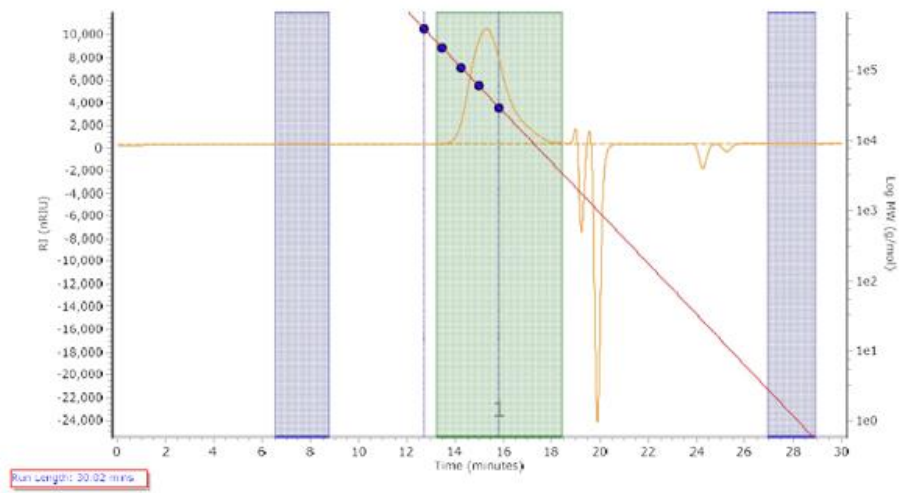

Distribution Plot

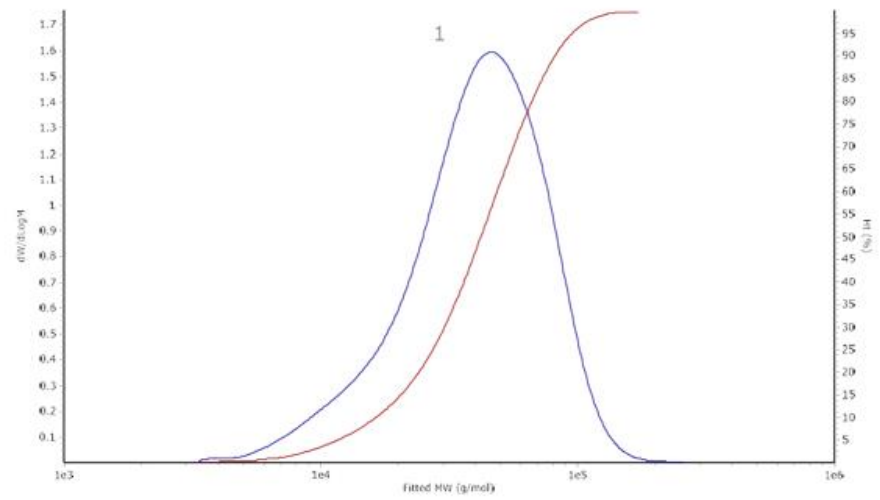

P9

Chromatogram Plot

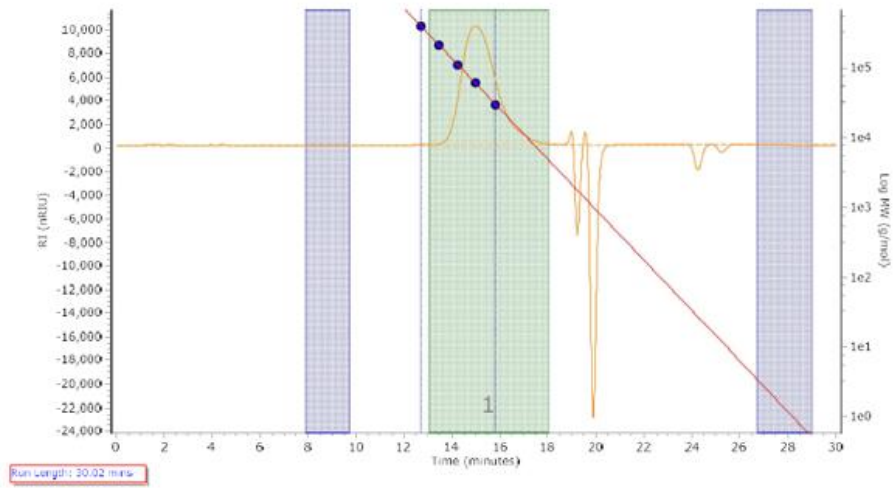

Distribution Plot

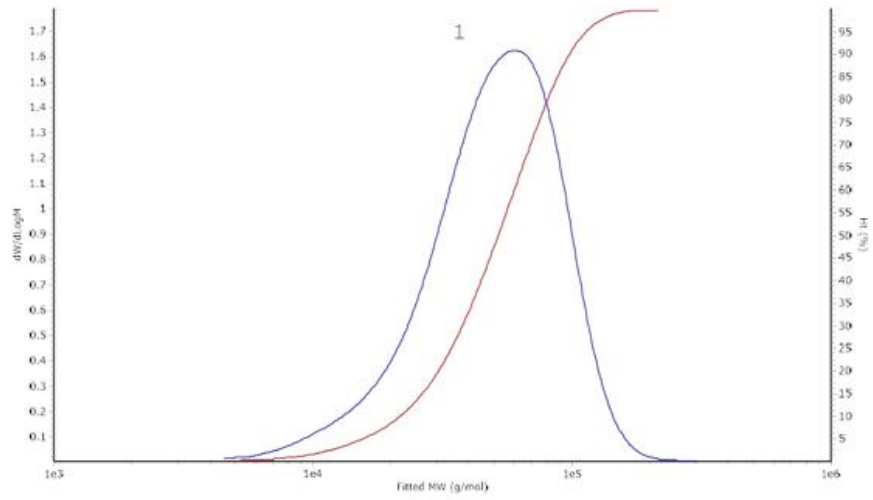

# P10

## Chromatogram Plot

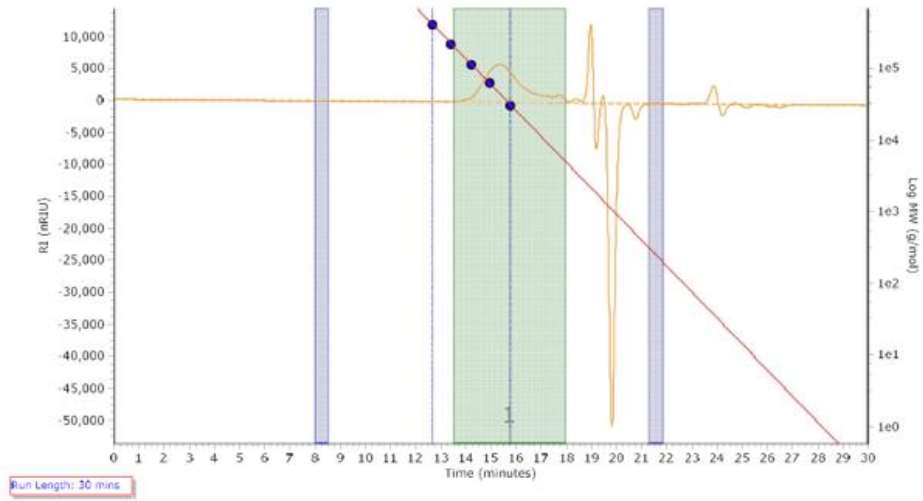

## Distribution Plot

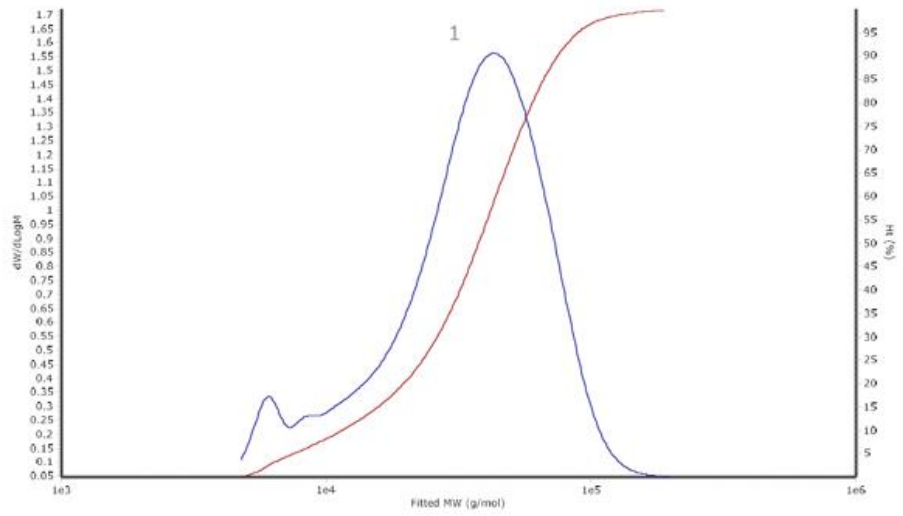

P11

Chromatogram Plot

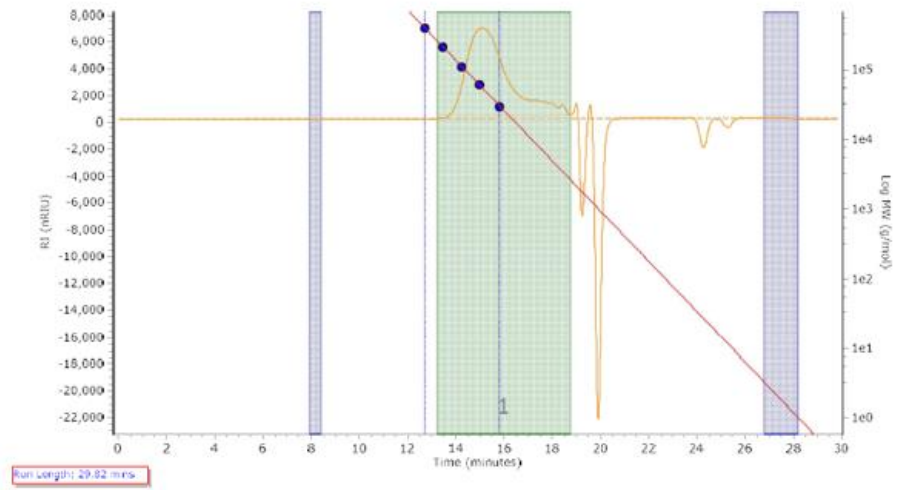

Distribution Plot

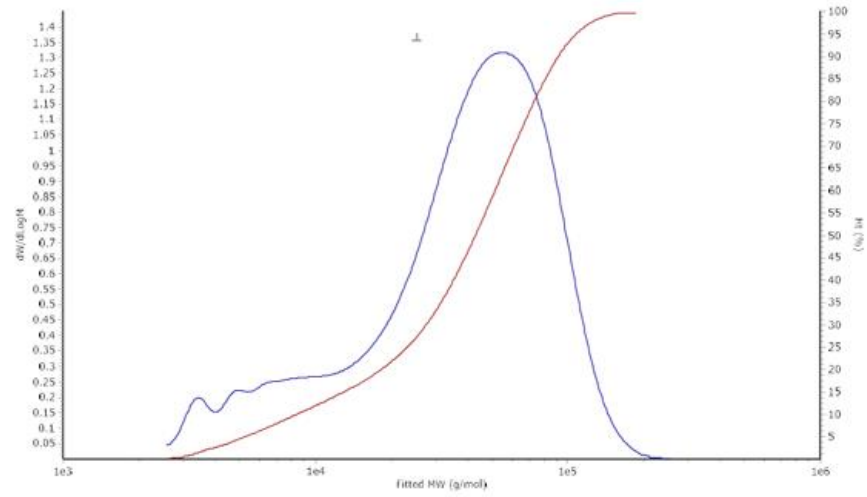

P12

Chromatogram Plot

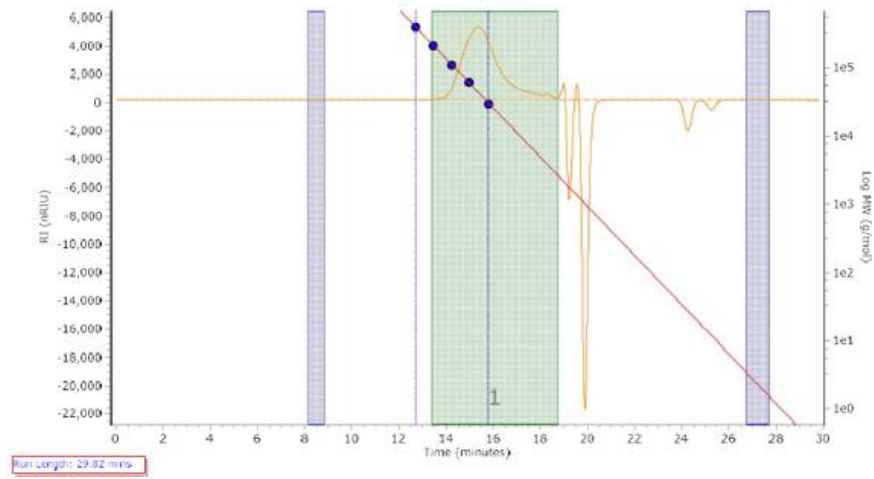

Distribution Plot

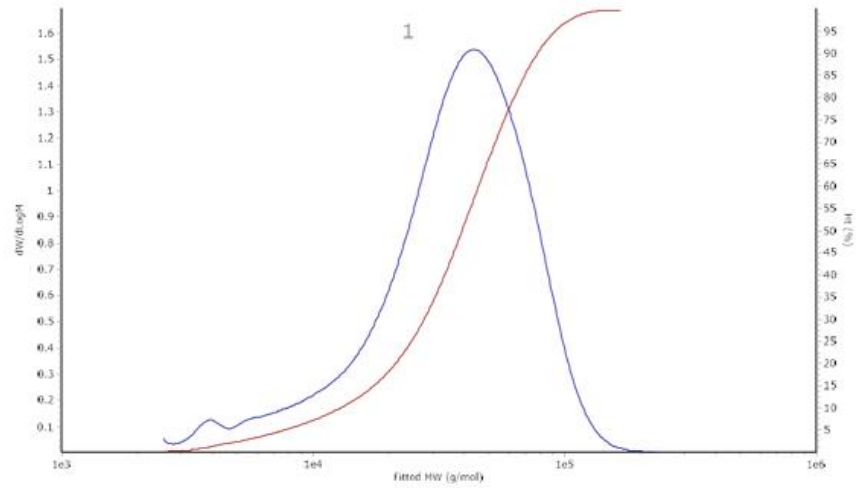

P13

Chromatogram Plot

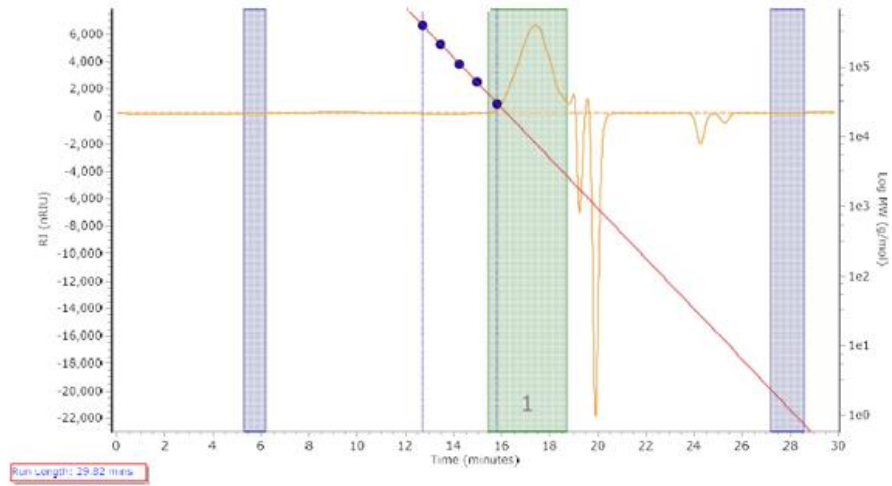

Distribution Plot

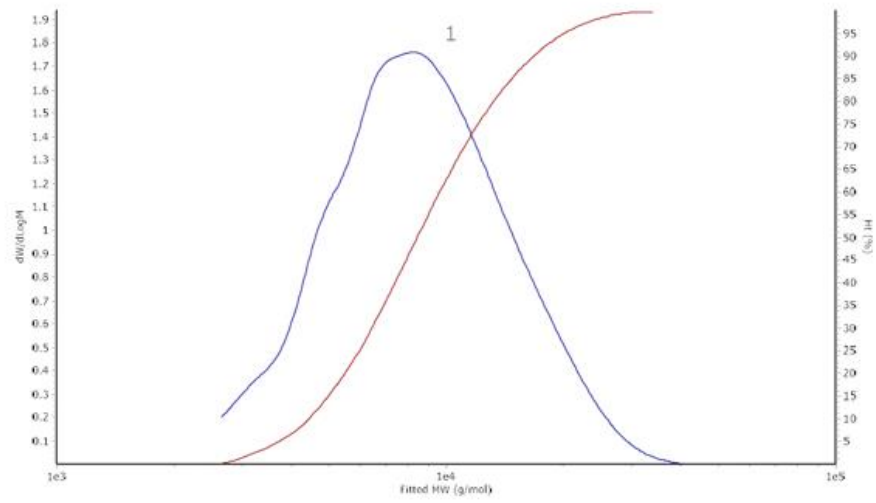

P14

Chromatogram Plot

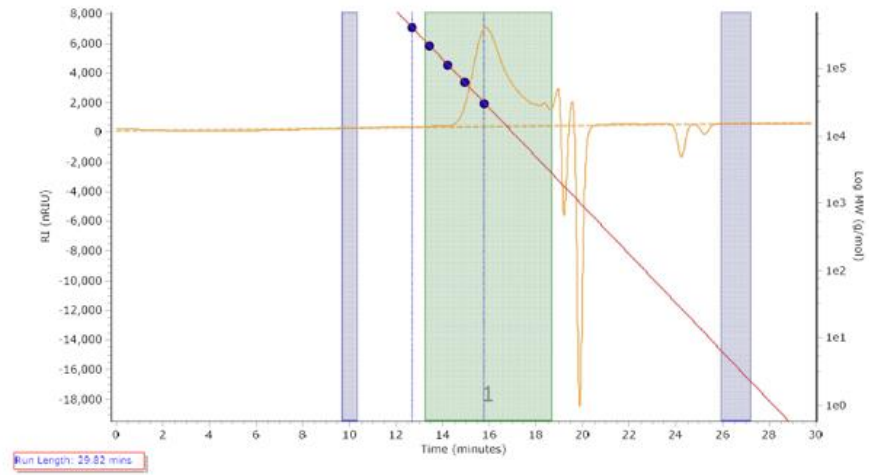

Distribution Plot

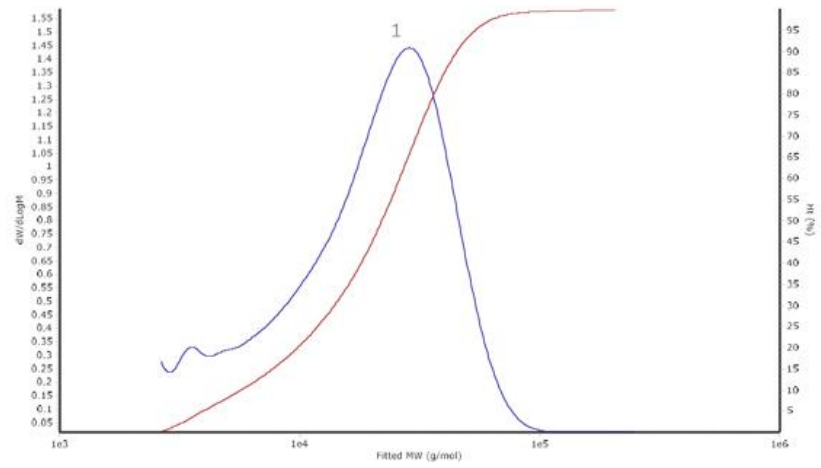



## 5. References

- (1) Shintani, R.; Ikehata, K.; Hayashi, T. Synthesis of Nine-Membered Azlactones by Palladium-Catalyzed Ring-Expansion of  $\gamma$ -Methylidene- $\delta$ -valerolactones with Aziridines. *J. Org. Chem.* **2011**, *76*, 4776-4780.
- (2) Zhang, W.; Wang, B.; Chen, N.; Du, D.-M.; Xu, J. Expeditious and practical synthesis of various substituted taurines from amino alcohols. *Synthesis* **2008**, 197-200.
- (3) Li, X.; Chen, N.; Xu, J. An Improved and Mild Wenker Synthesis of Aziridines. *Synthesis* **2010**, 3423-3428.
- (4) Alagiri, K.; Prabhu, K. R. Catalyst-Free Regio- and Stereospecific Synthesis of  $\beta$ -Sulfonamido Dithiocarbamates: Efficient Ring-Opening Reactions of *N*-Tosyl Aziridines by Dialkyldithiocarbamates. *Eur. J. Chem.* **2011**, *17*, 6922-6925.
